1  
2 **Nav1.1 in mammalian sensory neurons is required for normal motor**  
3 **behaviors**  
4  
5

6 Cyrrus M. Espino<sup>1†</sup>, Cheyanne M. Lewis<sup>1†</sup>, Serena Ortiz<sup>2</sup>, Miloni S. Dalal<sup>3</sup>, Kaylee M. Wells<sup>4</sup>,  
7 Darik A. O'Neil<sup>4</sup>, Katherine A. Wilkinson<sup>2</sup>, and Theanne N. Griffith<sup>1,4\*</sup>  
8  
9

10 <sup>1</sup>*Department of Physiology and Membrane Biology, University of California Davis, Davis, CA,*  
11 *95616*

12 <sup>2</sup>*Department of Biological Science, San José State University, San José, CA, 95192*

13 <sup>3</sup>*Department of Pharmacology, Physiology, and Neuroscience, New Jersey Medical School-*  
14 *Rutgers University, Newark, NJ, 07103*

15 <sup>4</sup>*Neurobiology course, Marine Biological Laboratory Woods Hole, MA, 02540*  
16

17 \*Corresponding Author: Theanne N. Griffith  
18 1275 Med Science Drive  
19 Tupper Hall 4135  
20 Davis, CA 95616  
21 530.754.2780  
22 [tgriffith@ucdavis.edu](mailto:tgriffith@ucdavis.edu)  
23

24 †These authors contributed equally to this work.

25 Conflicts of Interest: None to declare  
26

27 **Acknowledgements:** This research was supported by a Postdoctoral Enrichment Program  
28 Award from the Burroughs Wellcome Fund (TNG) and by 5T32GM099608-10 (CME). Work at San  
29 José State was supported by NIGMS 5SC3GM127195 (KAW) and NIGMS 5R25GM71381 (SO).  
30 Core facilities were supported by P30 EY12576. Part of this project was carried out at the Marine  
31 Biological Laboratory Neurobiology Course, with support from NINDS R25NS063307. Thanks to  
32 Drs. Jon Sack and Xinzhong Dong for sharing mouse lines, Drs. Jorge Contreras and Ioana  
33 Carcea for sharing behavioral equipment, Miguel Gonzalez Fernandez for writing code to  
34 automate *ex vivo* data analysis, and members of the Griffith laboratory for helpful discussions.  
35

---

36 **ABSTRACT**

37 The mammalian voltage-gated sodium channel (Nav), Nav1.1, has been well-studied in the central  
38 nervous system; conversely, its contribution to peripheral sensory neuron function is more  
39 enigmatic. Here, we report a new role for peripherally expressed Nav1.1 in murine motor  
40 behaviors. RNAscope analysis found 100% of proprioceptors express Nav1.1 transcript,  
41 consistent with *in vitro* patch clamp recordings showing this channel is required for repetitive firing  
42 in proprioceptors. Notably, genetic deletion of Nav1.1 in all sensory neurons caused profound  
43 motor coordination deficits in homozygous conditional knockout animals of both sexes, a  
44 phenotype similar to conditional Piezo2-knockout animals. Movement deficits were also observed  
45 in heterozygotes, demonstrating that Nav1.1 haploinsufficiency in sensory neurons leads to motor  
46 deficiencies. This behavioral phenotype was not due to reduced proprioceptor numbers or  
47 abnormal muscle spindle formation; however, we observed decreased proprioceptor innervation  
48 of motor neurons in the spinal cord in conditional knockouts, indicating loss of Nav1.1 in sensory  
49 neurons alters spinal cord circuitry. *Ex vivo* muscle afferent recordings also support the notion  
50 that loss of Nav1.1 leads to aberrant proprioceptor function. Collectively, these data provide the  
51 first evidence that Nav1.1 in mammalian sensory neurons is essential for motor coordination.  
52 Importantly, human patients harboring Nav1.1 loss-of-function mutations often present with motor  
53 delays and ataxia. Thus, our data suggest sensory neuron dysfunction may contribute to the  
54 clinical manifestations and co-morbidities of neurological disorders in which Nav1.1 function is  
55 compromised.

56

## 57 INTRODUCTION

58 Voltage gated sodium channels (Navs) are critical mediators of neuronal excitability and are  
59 responsible for action potential generation and propagation (Ahern et al., 2016; Bean, 2007) . In  
60 the mammalian nervous system there are nine isoforms (Nav1.1-1.9), each with unique  
61 biophysical properties, as well as distinguishing cellular expression and subcellular localization  
62 patterns (Bennett et al., 2019; Catterall, 2017). Of these different subtypes, Nav1.1 is notable for  
63 its role in brain disease (Escayg and Goldin, 2010; Mulley et al., 2005; Ogiwara et al., 2007).  
64 Indeed, *Scn1a*, the gene that encodes Nav1.1, is referred to as a “super culprit” gene, with over  
65 1,000 associated mutations that lead to abnormal brain function, resulting in brain disorders such  
66 as epilepsy and migraine, as well as neurodivergent phenotypes, such as autism spectrum  
67 disorder (Ding et al., 2021; Lossin, 2009). Homozygous Nav1.1<sup>-/-</sup> global knockout mice are ataxic  
68 and die by P15, while heterozygous Nav1.1<sup>+/-</sup> animals develop seizures and begin to die  
69 sporadically starting at P21 (Yu et al., 2006). In addition to the central nervous system, Nav1.1 is  
70 also expressed in the peripheral nervous system (Sharma et al., 2020; Usoskin et al., 2015); yet,  
71 the prominent role this channel plays in brain function has left its physiological roles in sensory  
72 neuron populations understudied.

73         Peripheral sensory neurons of the dorsal root and trigeminal ganglia (DRG and TG,  
74 respectively) are tasked with encoding somatic sensations, such as touch, temperature, pain, and  
75 proprioception, and are anatomically and functionally heterogenous (Kupari et al., 2021; Nguyen  
76 et al., 2021; Oliver et al., 2021; Wu et al., 2021). Nav1.1 transcript and protein have been observed  
77 primarily in myelinated mechanosensory DRG and TG neurons (Fukuoka et al., 2008; Ho and  
78 O’Leary, 2011; Osteen et al., 2016). Indeed, subcutaneous injection of the Nav1.1 activator,  
79 Hma1, into mouse hind paw causes non-inflammatory mechanical pain and spontaneous pain  
80 behaviors (Osteen et al., 2016). Interestingly, pharmacological inhibition of Nav1.1 does not affect  
81 mechanical thresholds in uninjured mice but does reduce mechanical pain in a spared-nerve

82 injury model (Salvatierra et al., 2018), suggesting Nav1.1 may have a more prominent role in  
83 mechanical pain as opposed to normal touch sensing. Nav1.1 in TG neurons has also been  
84 reported to mediate mechanical pain in an orbitofacial chronic constriction injury model (Pineda-  
85 Farias et al., 2021). In addition to somatosensory neurons, Nav1.1 is found in colon-innervating  
86 vagal neurons, where it contributes to firing of colonic mechano-nociceptors and is upregulated  
87 in a mouse model of chronic visceral hypersensitivity (Osteen et al., 2016; Salvatierra et al., 2018).  
88 Lastly, Nav1.1 contributes to action potential firing in a subset of DRG neurons that express the  
89 cold sensitive ion channel, transient receptor potential melastatin 8 (TRPM8), suggesting the  
90 channel may also contribute to thermosensory transmission (Griffith et al., 2019). While most data  
91 support a role for Nav1.1 in pain, the limited number of studies that have investigated Nav1.1  
92 function in sensory neurons has left gaps in our knowledge regarding other potential roles this  
93 channel may play in somatosensation.

94         Given the relatively under-explored role of Nav1.1 in the peripheral nervous system, we  
95 set out to determine what other somatosensory modalities rely on Nav1.1 expression in sensory  
96 neurons. Here, we show that 100% of proprioceptors express Nav1.1 mRNA. A functional role for  
97 the channel in these cells was supported by both *in vitro* and *ex-vivo* electrophysiological  
98 recordings from genetically identified proprioceptors and functionally identified muscle spindle  
99 afferents, respectively. Importantly, mice lacking Nav1.1 in all sensory neurons display visible and  
100 profound motor deficits and ataxic-like behavior, which were quantified in rotarod and open field  
101 assays. These deficits may be due to a combination of aberrant electrical signaling and altered  
102 spinal cord circuitry. Collectively, our data provide evidence for a new role for peripherally  
103 expressed Nav1.1 in proprioceptor function and motor coordination.

104



105 **MATERIALS AND METHODS**

106 **Key resources.** Table 1 contains a list of key resources and supplies used for this study.

| Reagent or Resource                            | Source                                              | Identifier                                                                                                                                          |
|------------------------------------------------|-----------------------------------------------------|-----------------------------------------------------------------------------------------------------------------------------------------------------|
| <b>Deposited Data</b>                          |                                                     |                                                                                                                                                     |
| Source data                                    | This paper                                          | doi: 10.17632/kt23th75v9.2                                                                                                                          |
| Matlab scripts                                 | This paper                                          | <a href="https://github.com/doctheagrif/Current-Clamp-Matlab-Code_O-Neil-DA">https://github.com/doctheagrif/Current-Clamp-Matlab-Code_O-Neil-DA</a> |
| <b>Antibodies</b>                              |                                                     |                                                                                                                                                     |
| Rabbit polyclonal anti-DsRed                   | Takara Bio                                          | Catalogue #632496                                                                                                                                   |
| Chicken polyclonal GFP                         | Abcam                                               | Catalogue #ab13970                                                                                                                                  |
| Chicken polyclonal NFH                         | Abcam                                               | Catalogue #ab4680                                                                                                                                   |
| Rabbit polyclonal CGRP                         | Immunostar                                          | Catalogue #24112                                                                                                                                    |
| Guinea pig polyclonal VGLUT1                   | Thomas Jessell Laboratory; HHMI Columbia University | Catalogue #CU1706, RRID:AB_2665455                                                                                                                  |
| Chicken polyclonal $\beta$ 3-tubulin           | Abcam                                               | Catalogue #ab41489                                                                                                                                  |
| Rabbit polyclonal $\beta$ 3-tubulin            | Abcam                                               | Catalogue #ab18207                                                                                                                                  |
| <b>Chemicals</b>                               |                                                     |                                                                                                                                                     |
| VECTASHIELD® Antifade Mounting Media with DAPI | Vector Laboratories                                 | Catalogue #H-2000                                                                                                                                   |
| Tissue-Tek OCT compound                        | Sakura                                              | Catalogue #4583                                                                                                                                     |
| Fluoromount-G DAPI                             | SouthernBiotech                                     | Catalogue #0100-20                                                                                                                                  |
| Laminin                                        | Sigma-Aldrich                                       | Catalogue #L2020-1MG                                                                                                                                |
| Collagenase type P                             | Sigma-Aldrich                                       | Catalogue #11213865001                                                                                                                              |
| TrypLE Express                                 | ThermoFisher                                        | Catalogue #12605-010                                                                                                                                |
| MEM                                            | ThermoFisher                                        | Catalogue #11095-080                                                                                                                                |
| Penicillin-streptomycin                        | ThermoFisher                                        | Catalogue #15140-122                                                                                                                                |
| MEM vitamin solution                           | ThermoFisher                                        | Catalogue #11120-052                                                                                                                                |
| B-27 supplement                                | ThermoFisher                                        | Catalogue #17504-044                                                                                                                                |
| Horse serum, heat inactivated                  | ThermoFisher                                        | Catalogue #26050-070                                                                                                                                |
| ICA 121431                                     | Tocris Bioscience                                   | Catalogue #5066/10                                                                                                                                  |
| <b>Critical Commercial Assays</b>              |                                                     |                                                                                                                                                     |
| RNAscope Fluorescence Multiplex Kit            | Advanced Cell Diagnostics                           | Catalogue #320851                                                                                                                                   |
| <b>Oligonucleotides</b>                        |                                                     |                                                                                                                                                     |
| <i>Pvalb</i> probe channel 1                   | Advanced Cell Diagnostics                           | Catalogue #421931                                                                                                                                   |
| <i>Scn1a</i> probe channel 2                   | Advanced Cell Diagnostics                           | Catalogue #556181-C2                                                                                                                                |
| <i>Runx3</i> probe channel 3                   | Advanced Cell Diagnostics                           | Catalogue #451271-C3                                                                                                                                |
| <b>Experimental Models: Mouse Strains</b>      |                                                     |                                                                                                                                                     |
| Pirt <sup>cre</sup>                            | Dr. Xinzhong Dong                                   |                                                                                                                                                     |
| Rosa26 <sup>Ai14</sup>                         | Jackson Laboratories                                | Stock #007914                                                                                                                                       |

|                                      |                         |                                                                                                                                                     |
|--------------------------------------|-------------------------|-----------------------------------------------------------------------------------------------------------------------------------------------------|
| PVcre                                | Jackson Laboratories    | Stock # 008069                                                                                                                                      |
| Nav1.1 <sup>fl/fl</sup>              | UC Davis MMRRC          | Stock # 041829-UCD                                                                                                                                  |
| MrgprD <sup>GFP</sup>                | Zheng et al., 2019      |                                                                                                                                                     |
| <b>Software and Algorithms</b>       |                         |                                                                                                                                                     |
| pClamp 11.2 Software Suite           | Molecular Devices       | <a href="https://www.moleculardevices.com">https://www.moleculardevices.com</a>                                                                     |
| Image J                              | Schneider et al. (2012) | <a href="https://imagej.nih.gov">https://imagej.nih.gov</a>                                                                                         |
| Prism 9                              | Graphpad                | <a href="https://www.graphpad.com">https://www.graphpad.com</a>                                                                                     |
| LabChart                             | ADInstruments           | <a href="https://www.adinstruments.com/products/labchart">https://www.adinstruments.com/products/labchart</a>                                       |
| MATLAB                               | MathWorks               | <a href="https://www.mathworks.com">https://www.mathworks.com</a>                                                                                   |
| Software, algorithm, custom (MATLAB) | This study              | <a href="https://github.com/doctheagrif/CURRENT-Clamp-Matlab-Code_O-Neil-DA">https://github.com/doctheagrif/CURRENT-Clamp-Matlab-Code_O-Neil-DA</a> |

107

108 **Animals.** Pirt<sup>cre</sup> mice were a kind gift from Dr. Xinzhong Dong (Johns Hopkins University).  
109 Rosa26<sup>Ai14</sup> (stock #007914; (Madisen et al., 2010)) and PV<sup>cre</sup> (stock # 008069) were obtained from  
110 Jackson Laboratories. Nav1.1<sup>fl/fl</sup> (stock # 041829-UCD) mice were purchased from the UC Davis  
111 MMRRC. MrgprD mice were originally published in Zheng et al., 2019. Genotyping was  
112 outsourced to Transnetyx. Animal use was conducted according to guidelines from the National  
113 Institutes of Health's Guide for the Care and Use of Laboratory Animals and was approved by the  
114 Institutional Animal Care and Use Committee of Rutgers University-Newark, UC Davis, and San  
115 José State University (*ex vivo* muscle recordings). Mice were maintained on a 12 h light/dark  
116 cycle, and food and water was provided *ad libitum*.

117

118 **Rotarod.** To assess motor coordination, a rotarod machine (IITC Life Sciences, Woodland Hills,  
119 CA) that has an accelerating rotating cylinder was used. Mice were acclimated to the behavior  
120 room for 2 h prior to testing. Mice were assayed on the rotarod for 3 consecutive days, with 3  
121 trials per day and an intertrial interval of at least 15 min. The average of the three trials per day  
122 was used. The experimenter was blind to genotype.

123

124 **Open field test.** Mice were acclimated to the behavior room for 2 h prior to testing. The open field  
125 apparatus consisted of a black square sound attenuating box of dimensions 40.6 cm × 40.6 cm.

126 A camera suspended above the arena was connected to a computer running Ethovision XT  
127 software, which tracked animal movement and velocity. An animal was placed in the center of the  
128 arena and allowed to freely explore for a 10 min trial. The experimenter was blind to genotype.

129

130 **Tissue processing.** For spinal cord immunolabeling experiments, whole spinal columns from  
131 adult  $Pirt^{Cre};Rosa26^{Ai14}$  and  $Pirt^{Cre};Nav1.1^{fl/fl}$  animals were harvested on ice. For Tdtomato IHC,  
132 spinal columns were fixed overnight at 4°C in 4% paraformaldehyde. For vesicular glutamate  
133 transporter 1 (VGLUT1) and choline acetyltransferase (ChAT) co-labeling experiments, spinal  
134 columns were fixed in 4% paraformaldehyde for 1 h on ice. Tissue was then placed in 30%  
135 sucrose solution overnight at 4°C. Following cryoprotection, tissue was embedded in optimal  
136 cutting temperature compound (OCT, Tissue-Tek® Sakura) and stored at -80°C until sectioning.  
137 DRG were harvested from thoracic spinal levels and fixed in 4% formaldehyde for 15 min at 4°C  
138 and were then incubated in 30% sucrose for 2-4 h at 4°C. DRG were embedded in OCT and  
139 stored at -80°C until sectioning.

140

141 **Immunohistochemistry.** Immunohistochemistry of spinal cord cryostat sections (30µm) was  
142 performed using the following primary antibodies: Rabbit anti-DsRed (1:3000, Takara Bio,  
143 632496), guinea pig anti-VGLUT1 (1:8000, Zuckerman Institute, 1705), and rabbit anti-ChAT  
144 (1:10,000, Zuckerman Institute, 1574). Secondary antibodies used were as follows: anti-rabbit  
145 594 (1:1000, ThermoFisher, A32740), anti-guinea pig 488 (1:1000, ThermoFisher, A11073), and  
146 anti-chicken 647 (ThermoFisher, A32733). Specimens were mounted with Fluoromount-G with  
147 DAPI (SouthernBiotech, 0100-20). EDL muscles used in *ex vivo* muscle afferent recordings were  
148 placed in ice cold 4% paraformaldehyde for 1 h followed by ice cold methanol for 15 min. Muscles  
149 were incubated in blocking solution (0.3% PBS-T and 1% BSA) followed by incubation in primary  
150 antibodies (guinea pig anti-VGLUT1 1:800 and chicken anti-NFH 1:300, ThermoFisher ab4680)

151 for 3-6 days at 4°C. After primary antibody treatment, tissue was washed in blocking solution and  
152 treated with secondary antibody (anti-guinea pig 488 1:50 and anti-chicken 594 1:300, Invitrogen,  
153 WA316328) for 2-3 days. Specimens were mounted with VECTASHIELD® with DAPI (H-2000,  
154 Vector Laboratories). All specimens were imaged in three dimensions on a on a Zeiss LSM880  
155 Airyscan confocal microscope. Images were analyzed using ImageJ software.

156

157 **Multiplex in situ hybridization.** Fixed-frozen DRG tissue was cut in 25µm sections and placed  
158 on electrostatically coated slides. Sections were processed for RNA *in situ* detection using a  
159 modified version of the manufacturer's protocol ((Griffith et al., 2019), Advanced Cell Diagnostics)  
160 and the following probes: *Pvalb* (421931- C1, mouse), *Runx3* (451271-C3, mouse), *Scn1a*  
161 (556181-C2, mouse). Following *in situ* hybridization, sections were incubated in blocking solution  
162 (5% normal goat serum, 0.1% PBS-T) for 1 h at RT. Tissue was then incubated in primary  
163 antibodies overnight at 4°C. The following antibodies were used: rabbit DsRed (1:3000, Takara  
164 Bio, 632496), rabbit β3-tubulin (1:3000, Abcam, ab18207), chicken β3-tubulin (1:500, Abcam,  
165 ab41489), rabbit CGRP (1:1000, Immunostar, 24112), chicken GFP (1:3000, Abcam, ab13970),  
166 and chicken NFH (1:3000, Abcam, ab4680). Tissue was treated with the following secondary  
167 antibodies for 45 min at RT: anti-rabbit 448 (1:1000, Invitrogen, A32731), 594 (1:1000, Invitrogen,  
168 A11037) and 647 (1:1000, Invitrogen, A32733), anti-chicken 488 (1:1000, Invitrogen, A32931)  
169 and 594 (1:1000, Invitrogen, A32740). Sections were washed and mounted with Fluoromount-G  
170 with DAPI and imaged in three dimensions (2µm axial steps) on an Olympus confocal (LV3000)  
171 using a 40X 0.90 NA water objective lens. Images were auto-thresholded and analyzed using  
172 ImageJ software.

173

174 **DRG culture preparation.** DRG were harvested from thoracic spinal levels of adult  
175 PV<sup>cre</sup>;Rosa26<sup>Ai14</sup> (6-16 weeks) mice of both sexes and transferred to Ca<sup>2+</sup>-free and Mg<sup>2+</sup>-free

176 HBSS solution (Invitrogen, 14170-112). Upon isolation, processes were trimmed, and ganglia  
177 were transferred into collagenase (1.5 mg/mL; Type P, Sigma-Aldrich, 11213865001) in HBSS  
178 for 20 min at 37°C followed by TrypLE Express (ThermoFisher, 12605-010) for 3 min with gentle  
179 rotation. TrypLE was neutralized with 10% horse serum (heat-inactivated; Invitrogen, 26050-070)  
180 and supplemented with culture media (MEM with L-glutamine, Phenol Red, without sodium  
181 pyruvate, ThermoFisher, 11095-080), containing 10,000 U/mL Penicillin-streptomycin  
182 (ThermoFisher, 15140-122), MEM Vitamin Solution (Invitrogen, 11120-052), and B-27  
183 supplement (ThermoFisher, 17504-044). Serum containing media was decanted and cells were  
184 triturated using a fire-polished Pasteur pipette in the MEM culture media described above. Cells  
185 were resuspended and triturated using a plastic pipette tip. Cells were plated on glass coverslips  
186 that had been washed in 2M NaOH for at least 4 h, rinsed with 70% ethanol, UV-sterilized, and  
187 treated with laminin (0.05 mg/mL, Sigma-Aldrich, L2020-1MG) for 1 hour prior to plating. Cells  
188 were then incubated at 37°C in 5% CO<sub>2</sub>. Cells were used for electrophysiology experiments 14-  
189 36 h post-plating.

190

191 **In Vitro Electrophysiology.** Whole-cell voltage-clamp recordings were made from TdTomato-  
192 expressing dissociated DRG neurons using patch pipettes pulled from Model P-1000 (Sutter  
193 Instruments). Patch pipettes had a resistance of 3-6MΩ when filled with an internal solution  
194 containing the following (in mM): 140 CsF, 10 NaCl, 1.1 EGTA, .1 CaCl<sub>2</sub>, 10 HEPES, and 2.5  
195 MgATP, pH with CsOH to 7.2. Seals and whole-cell configuration were obtained in an external  
196 solution containing the following (in mM): 145 NaCl, 5 KCl, 10 HEPES, 10 Glucose, 2 CaCl<sub>2</sub>, 2  
197 MgCl<sub>2</sub>, pH 7.3 with NaOH, osmolarity ~320mOsm. Series resistance was compensated by 70-  
198 80%. To isolate whole-cell sodium currents during voltage clamp experiments, a modified external  
199 solution was applied containing the following solution (in mM): 50 NaCl, 95 TEA-Cl, 10 HEPES,  
200 2 BaCl<sub>2</sub>, 13 glucose, 0.03 CdCl<sub>2</sub>, pH 7.3 with NaOH, Osmolarity ~320mOsm. Voltage clamp

201 recordings were performed at room temperature and current clamp recordings were conducted  
202 at 37°C. Bath temperature was controlled and monitored using CL-100 (Warner Instruments).

203

204 **Ex vivo electrophysiology.** The effect of the loss of Na<sub>v</sub>1.1 on muscle spindle afferent firing  
205 rates during muscle stretch and sinusoidal vibration was determined using an isolated muscle  
206 nerve preparation. The extensor digitorum longus muscle and innervating peroneal branch of the  
207 sciatic nerve were dissected from adult (2-4 month old) mice of both sexes. Muscles were held at  
208 optimal length (Lo), or the length of the muscle that maximal force of twitch contraction occurred.  
209 A series of nine 4 s ramp-and-hold stretches were given to 3 different stretch lengths repeated 3  
210 times each (2.5%, 5%, and 7.5% Lo; ramp speed 40% Lo/s). A series of twelve 9 s sinusoidal  
211 vibrations were given (25, 50, and 100 μm amplitude; 10, 25, 50, and 100 Hz frequency). A one-  
212 minute rest was given between each length change. Firing rates during a 10 s baseline before  
213 stretch (resting discharge or RD) and the maximal firing rate during the ramp up phase of stretch  
214 (dynamic peak or DP) were calculated for all animals. We determined whether the response to  
215 static stretch was maintained consistently throughout the 4s stretch, as well as the coefficient of  
216 variability of the interspike interval (ISI) during the plateau phase of stretch (CV = Std Dev/Mean  
217 of ISI over the time period of 1.5-3.5s after end of ramp up). Average firing rate during the 9 s of  
218 vibration and whether the unit could entrain in a 1:1 fashion to vibration was also determined.  
219 Detailed methods can be found in Wilkinson et al., 2012.

220

221 **Data acquisition and analysis.** Currents and voltages were acquired using pClamp software  
222 v11.2 (Molecular Devices). Recordings were obtained using an AxoPatch 200b patch-clamp  
223 amplifier and a Digidata 1550B and filtered at 5 kHz and digitized at 10 kHz. Voltage-clamp and  
224 current-clamp experiments were analyzed with Clampfit software v11.2 (Molecular Devices) and  
225 custom MatLab Scripts. *Ex vivo* recordings were obtained using an A-M Systems Model 1800

226 extracellular amplifier with headstage and digitized using an ADInstruments PowerLab. Data was  
227 analyzed using ADInstruments LabChart software using the Spike Histogram function.

228

229 **Pharmacology.** ICA 121431 was purchased from Tocris Bioscience. All other chemicals were  
230 from Sigma-Aldrich and Fisher Chemical.

231

232 **Experimental design and statistical analysis.** Summary data are presented as mean  $\pm$  SD from  
233  $n$  cells or afferents, or  $N$  animals. For quantitative analysis of *in situ* hybridization data, at least 3  
234 biological replicates per condition were used and the investigator was blinded to genotype for  
235 analysis. Statistical differences was determine using parametric tests for normally distributed data  
236 and non-parametric tests for data that did not conform to Gaussian distributions or had different  
237 variances. Statistical tests are listed in *Results* and/or figure legends. Statistical significance in  
238 each case is denoted as follows: \* $p < 0.05$ , \*\* $p < 0.01$ , \*\*\* $p < 0.001$ , and \*\*\*\* $p < 0.0001$ . Statistical  
239 tests and curve fits were performed using Prism 9.0 (GraphPad Software).

240

## 241 **RESULTS**

242 Most studies have found  $\text{Na}_v1.1$  expression primarily in myelinated sensory neurons that  
243 transmit mechanical signals (Fukuoka et al., 2008; Ho and O'Leary, 2011; Wang et al., 2011). In  
244 line with prior work, RNAscope analysis of DRG sections from adult mice show that 93% of  
245 myelinated neurons, as determined by neurofilament heavy chain (NFH) labeling, expressed  
246  $\text{Na}_v1.1$  transcripts (**Fig 1A**). RNA-sequencing datasets have consistently identified  $\text{Na}_v1.1$   
247 expression in proprioceptors; thus, we next analyzed  $\text{Na}_v1.1$  expression in genetically identified  
248 proprioceptors and found 100% of those neurons were positive for  $\text{Na}_v1.1$  message (**Fig 1B**),  
249 consistent with the observation that  $\text{Na}_v1.1$  protein is expressed in muscle spindle afferents  
250 (Carrasco et al., 2017), which innervate proprioceptive end organs found in skeletal muscle. This



251 contrasted with low expression of Nav1.1 in both calcitonin gene related peptide (CGRP)  
 252 expressing neurons, which represent peptidergic nociceptors, and non-peptidergic polymodal  
 253 MrgprD-expressing nociceptors (24% and 3%, respectively, **Fig 1C-D**). The coefficient of variation  
 254 for the integrated fluorescence density of Nav1.1 transcripts from RNAscope experiments in  
 255 proprioceptors was 76.5 (**Fig 1E-F**).

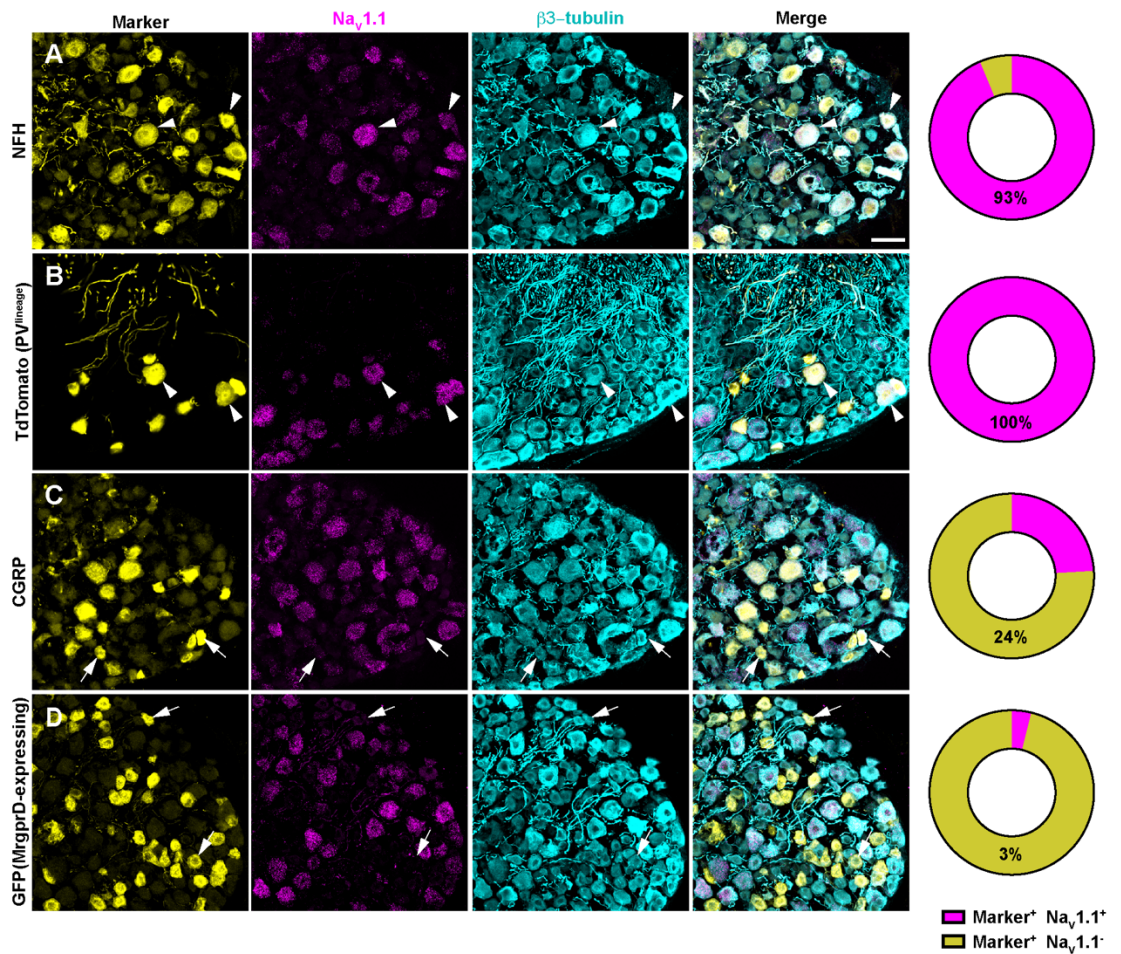



256

257 **Figure 1. Nav1.1 is ubiquitously expressed in genetically identified proprioceptors. A-D**, Representative confocal  
258 images of cryoprotected adult DRG sections (25  $\mu$ m) with quantifications indicating the percentage of Nav1.1+ and  
259 Nav1.1- neurons in each subpopulation. Images were acquired with a 40X, 0.9 NA water-immersion objective. Sections  
260 were hybridized using RNAscope with probes targeting Nav1.1 (*Scn1a*, magenta) and stained with the following  
261 antibodies (yellow): **(A)** anti-neurofilament heavy (NFH, n=787) **(B)** anti-DsRed (TdTomato, n=143) **(C)** anti-calcitonin  
262 gene-related peptide (CGRP, n=877) ( and **(D)** anti-GFP to label MrgprD+ neurons. C57BL/6,  
263 Parvalbumin<sup>Cre</sup>;Rosa26<sup>Ai14</sup>, and Mrgprd<sup>GFP</sup> DRG we used (n=774). All sections were stained with anti- $\beta$ 3-tubulin (cyan).  
264 Scale bar 50 $\mu$ m. White arrowheads indicate Nav1.1+ neurons while white arrows indicate Nav1.1- neurons. Frequency  
265 **(E)** and cumulative **(F)** distribution plots of integrated fluorescence density of Nav1.1 in TdTomato+ proprioceptors  
266 (n=153) **B**. n = cells.  
267

268 To determine if Nav1.1 message in proprioceptors is translated into functional surface  
269 protein, we performed pharmacological *in vitro* patch clamp experiments from TdTomato+  
270 neurons harvested from Parvalbumin<sup>Cre</sup>;Rosa26<sup>Ai14</sup> (PV<sup>Ai14</sup>) adult mice (6-15 weeks, N = 10 mice),  
271 which represent genetically identifiable proprioceptors harvested from thoracic spinal levels (de  
272 Nooij et al., 2013). The Nav1.1 blocker, ICA 121431 (ICA, 500 nM), was used to block Nav1.1.  
273 While ICA also blocks Nav1.3, those channels are not expressed in uninjured adult DRG neurons  
274 (Chang et al., 2018; Felts et al., 1997; He et al., 2010; Usoskin et al., 2015; Waxman et al., 1994)  
275 and RNA-sequencing has not found Nav1.3 message in proprioceptors. In voltage clamp  
276 experiments, ICA application reduced the whole-cell sodium current ( $I_{Na}$ ) on average by 46%,  
277 suggesting Nav1.1 is a dominant sodium channel isoform in these neurons (**Fig 2A-B**).  $I_{Na}$  density  
278 in proprioceptors on average fell from -150 pA/pF to -80 pA/pF following wash on of ICA (**Fig 2C**).  
279  $I_{Na}$  had an average decay tau of 0.8 ms in proprioceptors, which was significantly slowed to 1.1  
280 ms following application of ICA (**Fig 2D**). Blocking Nav1.1 also resulted in a moderate but  
281 significant slowing of the sodium current rise time from 0.2 ms to 0.3 ms (**Fig 2E**). Quantification  
282 of the ICA-sensitive component found an average decay tau of 0.5 ms and an average current  
283 density of -89 pA/pF (**Fig 2F**). Of note, there was a wide distribution of current densities for the  
284 ICA-sensitive component, ranging from  $\sim$ -37 pA/pF to  $\sim$ -168 pA/pF, suggesting some variability  
285 in the contribution of Nav1.1 to proprioceptor excitability. As such, we next used current clamp  
286 experiments to determine of effect of ICA on proprioceptor action potential firing (**Fig 2G**).

287 Analysis of current clamp data showed that pharmacological inhibition of Nav1.1 significantly  
 288 reduced the number of evoked action potentials in most genetically identified proprioceptors (**Fig**  
 289 **2H**); however, of the 20 cells recorded, 5 had low firing rates that were not further inhibited by  
 290 ICA, indicating in some proprioceptors subtypes other Nav<sub>v</sub>s mediate to action potential firing.  
 291 Action potential amplitude (**Fig 2I**,  $p = 0.0420$ ) and action potential threshold (**Fig 2J**,  $p = 0.0186$ )  
 292 were also significantly reduced following ICA application. The reduction in action potential  
 293 threshold is consistent with loss of Nav<sub>v</sub>1.1, which has a  $V_{1/2}$  of activation of  $\sim -15$  mV (Aman et  
 294 al., 2009). We also observed a significant increase in action potential full-width half-max following  
 295 ICA application (**Fig 2K**,  $p = 0.0068$ ), in line with loss of the fast Nav<sub>v</sub>1.1-mediated current. To our  
 296 knowledge, these data are the first reported analysis of the  $I_{Na}$  in proprioceptors and identify  
 297 Nav<sub>v</sub>1.1 as a major contributor.  
 298

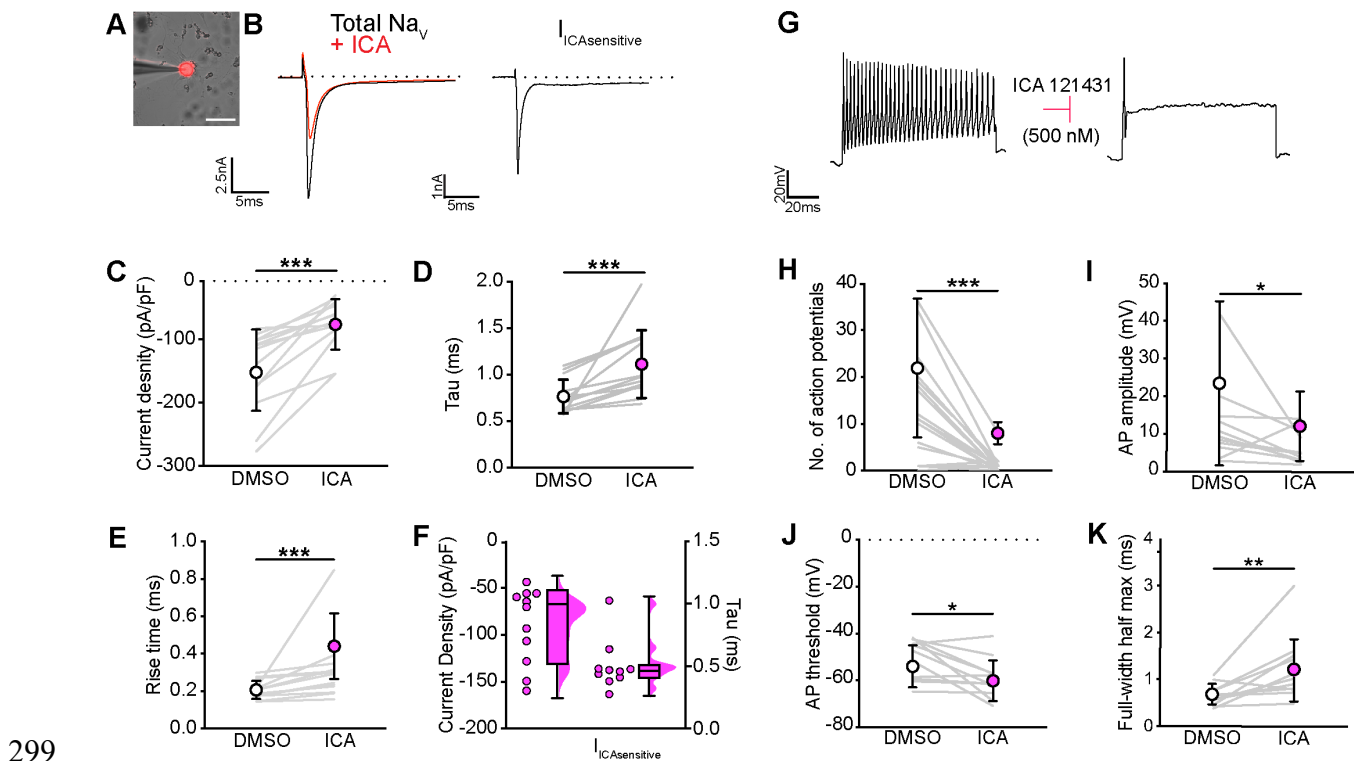

300 **Figure 2. Nav1.1 significantly contributes to the whole-cell sodium current and intrinsic excitability in**  
 301 **genetically identified proprioceptors.** **A.** Representative image of a TdTomato-positive proprioceptor in culture  
 302 during electrophysiological recordings (scale bar set to 50 $\mu$ m). **B.** Left, representative whole-cell voltage-clamp traces

303 elicited before (black) and after (red) application of ICA121431 (500nM). Right, the subtracted ICA-sensitive current  
304 shown in black. **C.** Quantification of the reduction in whole-cell current density before (white) and after (magenta) ICA,  
305  $p = 0.0002$ ,  $n=13$  cells. **D.** Quantification of rate of current decay before and after ICA,  $p = 0.0002$ ,  $n=13$  cells. **E.**  
306 Quantification of whole-cell current rise time before and after ICA,  $p = 0.0002$ ,  $n=13$  cells. **F.** Left, current densities of  
307 ICA-sensitive sodium currents ( $n=11$ ), right, current decay taus of ICA-sensitive sodium currents ( $n=10$  cells). **G.**  
308 Representative whole-cell current clamp traces before (left) and after (right) application of ICA. **H-K.** Quantification of  
309 number of action potentials in response to current injection (**H**,  $p = 0.0002$ ,  $n=20$  cells), action potential amplitude (**I**,  $p$   
310  $= 0.0420$ ,  $n=20$  cells), action potential threshold (**J**,  $p = 0.0186$ ,  $n=20$  cells), and full-width half max (**K**,  $p = 0.0068$ ,  $n=20$   
311 cells). Grey lines represent paired observations, circles and lines represent means and standard deviations. White  
312 circles, before ICA application. The Wilcoxon matched-pairs signed rank test was used to determine significance.

313  
314 We next sought to determine if Nav<sub>v</sub>1.1 plays an *in vivo* role in motor behaviors. Nav<sub>v</sub>1.1  
315 makes critical contributions to the excitability of parvalbumin-positive interneurons in the brain;  
316 thus, we were precluded from using a PV<sup>Cre</sup> driver line to directly interrogate a role for Nav<sub>v</sub>1.1 in  
317 proprioceptors, as loss of Nav<sub>v</sub>1.1 in these interneurons produces an epilepsy phenotype that  
318 complicates behavioral analyses in adult animals (Ogiwara et al., 2007). As such, we used a  
319 Pirt<sup>Cre</sup> driver to delete Nav<sub>v</sub>1.1 in all sensory neurons to determine the contribution of peripherally  
320 expressed Nav<sub>v</sub>1.1 to motor behaviors (Kim et al., 2008). Consistent with *in vitro* data,  
321 Pirt<sup>Cre</sup>;Nav<sub>v</sub>1.1<sup>fl/fl</sup> (Nav<sub>v</sub>1.1<sup>ckO</sup>) animals of both sexes displayed profound and visible motor  
322 abnormalities. These abnormalities include ataxic-like tremors when suspended in the air  
323 (**Supplemental video 1**), abnormal limb positioning (**Supplemental videos 2-3**), and paw  
324 claspings, which are absent in Nav<sub>v</sub>1.1<sup>fl/fl</sup> littermate controls and heterozygous animals  
325 (Pirt<sup>Cre</sup>;Nav<sub>v</sub>1.1<sup>fl/+</sup>, Nav<sub>v</sub>1.1<sup>Het</sup>, respectively, **Fig 3A**). We first ran animals in the open field test for  
326 ten minutes each to quantify spontaneous locomotor behaviors (**Fig 3B**). We found that Nav<sub>v</sub>1.1<sup>ckO</sup>  
327 animals traveled significantly less (**Fig 3C**) and slower (**Fig 3D**) than Nav<sub>v</sub>1.1<sup>fl/fl</sup> littermate controls  
328 ( $p = 0.0077$  and  $0.0057$ , respectively). Surprisingly, Nav<sub>v</sub>1.1<sup>Het</sup> mice also displayed motor  
329 abnormalities in the open field test, performing similarly to Nav<sub>v</sub>1.1<sup>ckO</sup> animals (**Fig 3B-D**),  
330 demonstrating Nav<sub>v</sub>1.1 haploinsufficiency in sensory neurons for motor behaviors. No genotype-  
331 dependent differences were observed in the amount of time spent moving, suggesting gross  
332 motor function was intact (**Fig 3E**). Additionally, the amount of time spent in the center of the open  
333 field chamber was also independent of genotype (**Fig 3F**). We next used the rotarod assay to  
334 investigate differences in motor coordination. Mice were assayed on three consecutive days and

335 latency-to-fall and RPM were quantified. Unlike in the open field assay, both  $\text{Na}_v1.1^{\text{fl/fl}}$  and  
336  $\text{Na}_v1.1^{\text{Het}}$  mice performed at similar levels during the three-day period (**Fig G-H**). Conversely,  
337  $\text{Na}_v1.1^{\text{cKO}}$  animals performed significantly worse. By day 3, on average they were only able to  
338 maintain their position on the rotarod for 41 s, falling over 50% faster  $\text{Na}_v1.1^{\text{fl/fl}}$  and  $\text{Na}_v1.1^{\text{Het}}$  mice.  
339 We did not observe any sex dependent differences in performance in the open field or rotarod  
340 tests (**Supplementary Fig 1**). We confirmed that our mouse model selectively targeted sensory  
341 neurons by crossing a  $\text{Pirt}^{\text{Cre}}$  driver with a fluorescent reporter line ( $\text{Pirt}^{\text{Cre}};\text{Rosa26}^{\text{Ai14}}$ ). We  
342 observed little-to-no neuronal expression of TdTomato in both dorsal and ventral spinal cord  
343 (**Supplementary Fig 2**). In contrast, DRG neurons somata and axons showed strong labeling.  
344 Collectively, our behavioral data provide evidence for a new *in vivo* role of  $\text{Na}_v1.1$  in sensory  
345 neurons in motor behaviors and coordination.

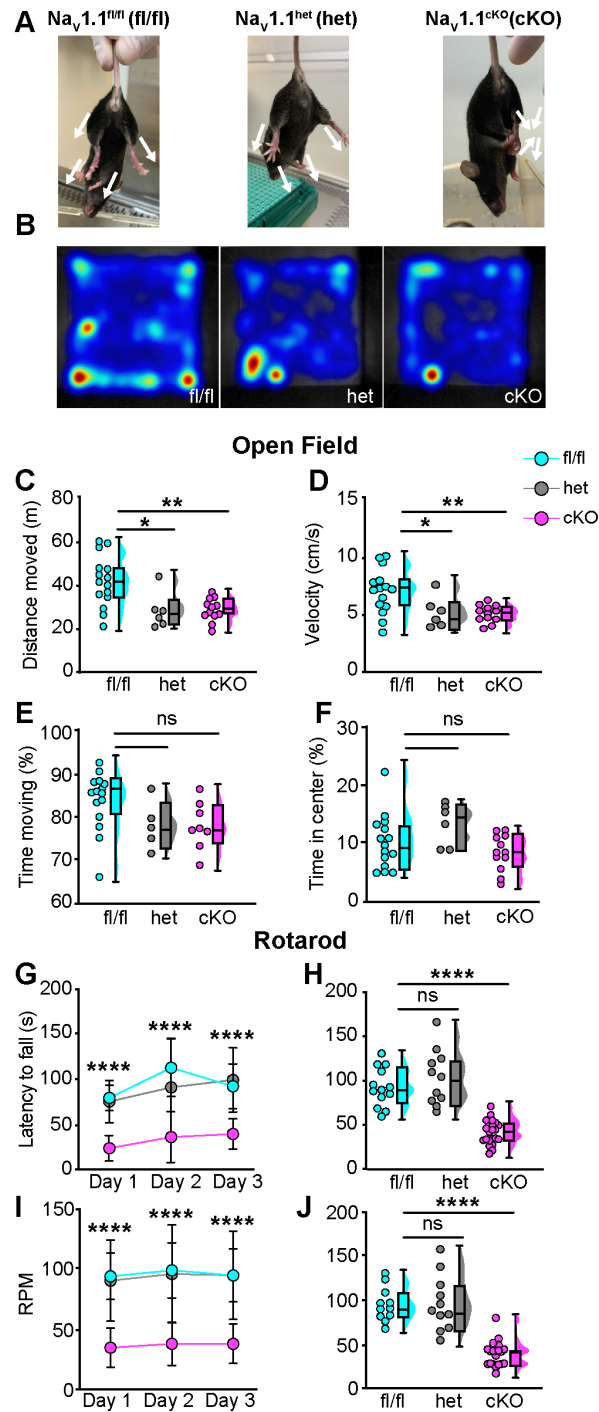

346

347 **Figure 3. Loss of Nav1.1 in peripheral sensory causes deficits in motor behaviors.** **A.** Representative images  
 348 showing limb positions of adult  $Na_v1.1^{fl/fl}$  (left),  $Na_v1.1^{Het}$  (middle), and  $Na_v1.1^{cKO}$  (right) mice. White arrows represent  
 349 the direction of limbs. **B.** Representative heat maps from open field experiments between  $Na_v1.1^{fl/fl}$  (left),  $Na_v1.1^{Het}$   
 350 (middle), and  $Na_v1.1^{cKO}$  (right). **Open Field (C-F),** Quantification of total distance traveled during a 10-minute open-field  
 351 test between  $Na_v1.1^{fl/fl}$  (cyan),  $Na_v1.1^{Het}$  (grey), and  $Na_v1.1^{cKO}$  (magenta) mice (**C**,  $Na_v1.1^{Het}$   $p = 0.0255$ ,  $Na_v1.1^{cKO}$ ,  $p$   
 352  $= 0.0077$ , compared to  $Na_v1.1^{fl/fl}$ ), average animal velocity (**D**,  $Na_v1.1^{Het}$   $p = 0.00311$ ,  $Na_v1.1^{cKO}$ ,  $p = 0.0057$ , compared  
 353 to  $Na_v1.1^{fl/fl}$ ), percent time moving (**E**,  $Na_v1.1^{Het}$   $p = 0.1362$ ,  $Na_v1.1^{cKO}$ ,  $p = 0.0730$ , compared to  $Na_v1.1^{fl/fl}$ ), and percent  
 354 time spent in center (**F**,  $Na_v1.1^{Het}$   $p = 0.2297$ ,  $Na_v1.1^{cKO}$ ,  $p = 0.2494$ , compared to  $Na_v1.1^{fl/fl}$ ) during the test. **Rotarod**

355 (G-I), Quantification of the latency to fall across three consecutive training days (G) and the day-three (H). Quantification  
 356 of revolutions per minute (RPM) at the moment of animal fall (I) and the day-three average (J). Each dot represents  
 357 one animal. \*\*\*\*p < 0.0001. A one-way ANOVA (Dunnett's post hoc comparison) was used to determine statistical  
 358 significance in C-F and I and J. A two-way mixed-design ANOVA (Dunnett's post hoc comparison) was used to  
 359 determine statistical significance in G and H. Open field: Nav1.1<sup>fl/fl</sup> N=15, Nav1.1<sup>Het</sup> N=6, Nav1.1<sup>ckO</sup> N=12. Rotarod:  
 360 Nav1.1<sup>fl/fl</sup> N=11, Nav1.1<sup>Het</sup> N=11, Nav1.1<sup>ckO</sup> N=20.  
 361

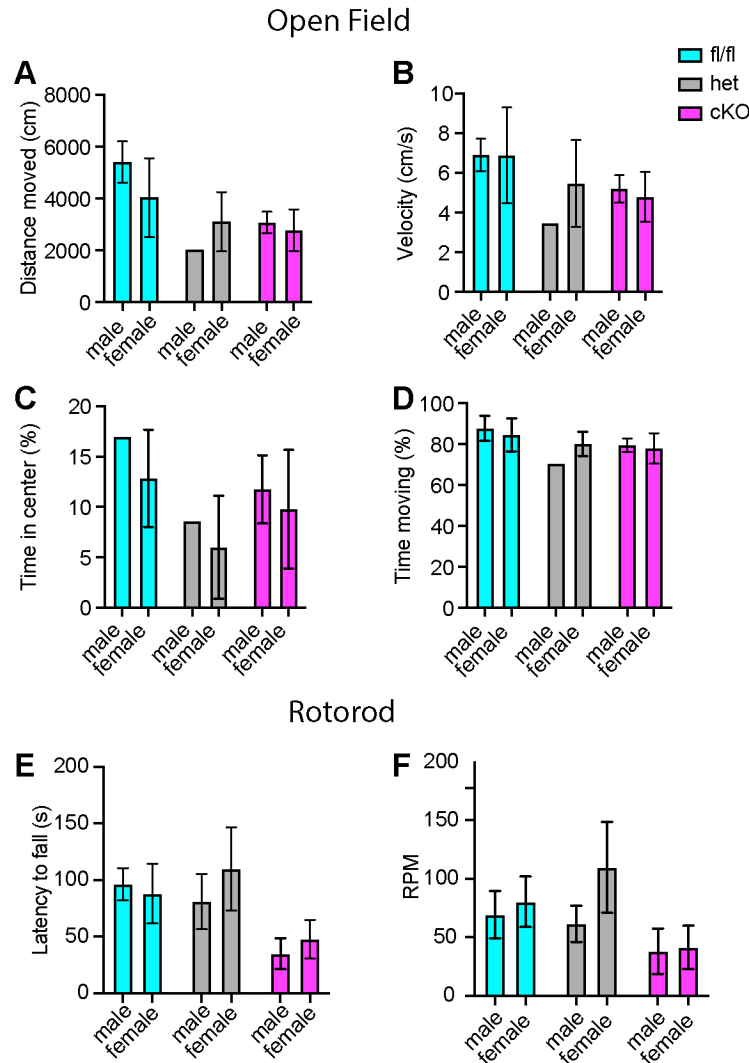

362

363 **Supplementary Figure 1. Motor deficits in Nav1.1<sup>Het</sup> and Nav1.1<sup>ckO</sup> animals are not sex dependent. A-D.**  
 364 Quantification of sex-dependent parameters during a 10-minute open field trial. Total distance moved (A). Velocity (B).  
 365 Percent time spent in center of box (C). Total percent time moving (D). Quantification of the sex-dependent differences  
 366 in rotarod day-three trial latency to fall (E) and RPM (F).



367

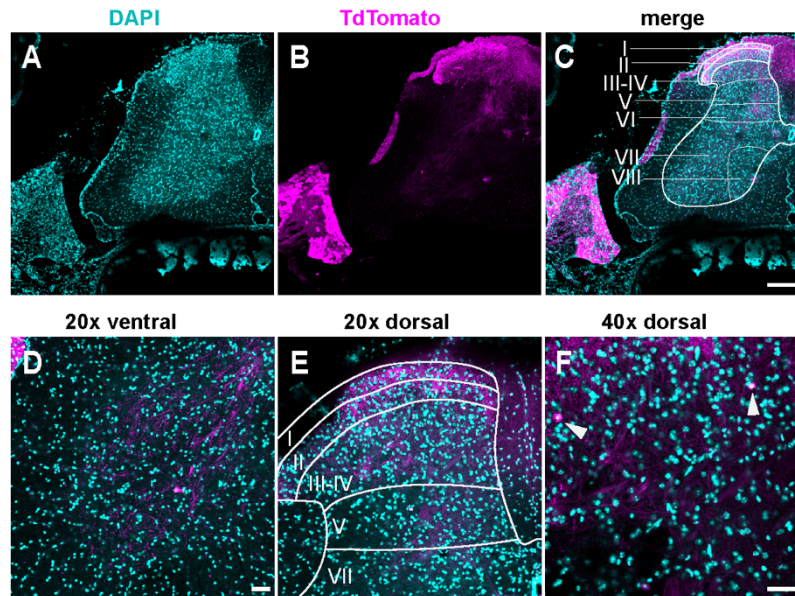

368 **Supplementary Figure 2. TdTomato expression is limited to sensory neurons. A-D**, Images stained using  
369 immunohistochemistry with anti-DsRed (TdTomato) (A-C) Representative confocal images of spinal cord sections at  
370 10X, 0.45 NA dry objective. Scale bar 200 $\mu$ m. (D) Image was taken at 20X, 0.8 NA dry objective of the ventral horn.  
371 (E) Image was taken at 20X, 0.8 NA dry objective of the dorsal horn. Scale bar 50 $\mu$ m. (F) Image was taken at 40X, 1.3  
372 NA oil-immersion objective. Arrows indicate TdTomato+ puncta. Scale bar 50 $\mu$ m. (N=3, n=30 sections).

373

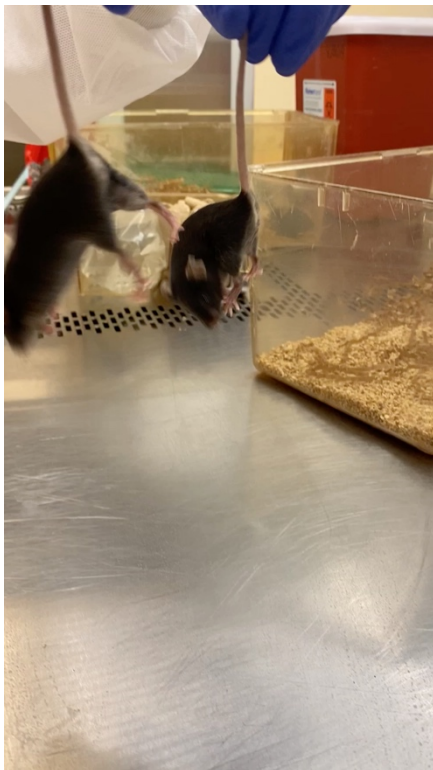

**Supplemental Video 1. Uncoordinated movements in  $Nav1.1^{cko}$  animals.** A  $Nav1.1^{cko}$  mouse (left) shows abnormal and spastic movements when suspended in the air. These movements are absent in  $Nav1.1^{fl/fl}$  mice (right).

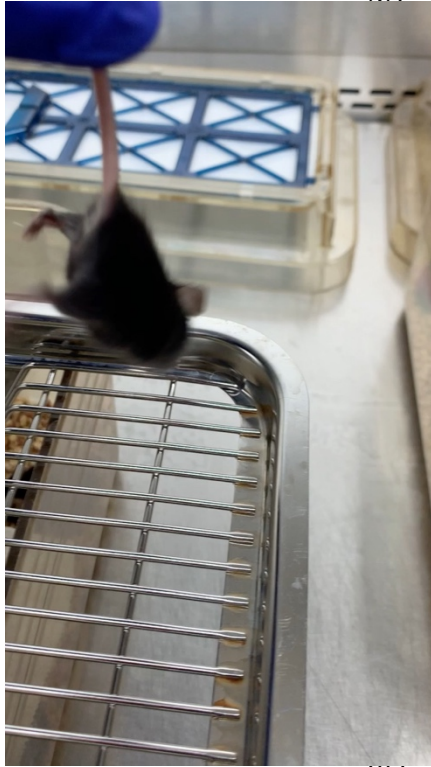

**Supplemental Video 2. Abnormal limb position in  $Nav1.1^{cko}$  animals.** A  $Nav1.1^{cko}$  mouse has uncoordinated leg movements and makes an abnormal rotation of its hind paw to grasp its tail while suspended in the air.

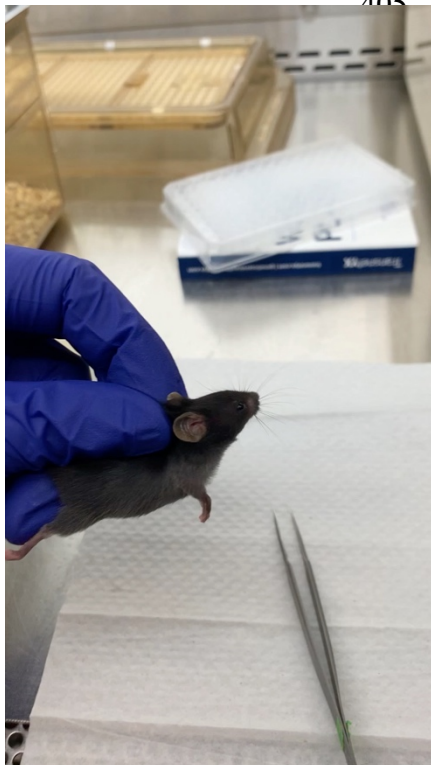

**Supplemental Video 3. Abnormal paw position in  $Nav1.1^{cko}$  animals.** A  $Nav1.1^{cko}$  mouse is scruffed and places hind paws with foot pads facing down. This contrasts with the normal paw positioning seen in the forepaws, in which foot pads are in the outward facing position.



412 Pharmacological inhibition of Nav1.1 in proprioceptors *in vitro* significantly reduced  
413 intrinsic excitability. Thus, we next asked whether proprioceptor transmission was reduced in  
414 Nav1.1<sup>ckO</sup> animals. We recorded proprioceptor firing in an *ex vivo* preparation during ramp-and-  
415 hold stretch and sinusoidal vibration. Afferents from both Nav1.1<sup>Het</sup> and Nav1.1<sup>ckO</sup> mice exhibited  
416 impaired static stretch sensitivity as evidenced by a decreased likelihood of firing during rest as  
417 compared to Nav1.1<sup>fl/fl</sup> mice as well as an inability to maintain firing throughout the entire 4s  
418 stretch. Almost all afferents from Nav1.1<sup>fl/fl</sup> mice could fire consistently throughout the entire 4s  
419 hold phase (**Fig 4A**), but loss of one or both copies of Nav1.1 led to either firing only near the  
420 beginning of stretch or inconsistent firing in a high percentage of afferents lacking Nav1.1 (**Fig**  
421 **4B,C**). We quantified this inconsistent firing by determining the coefficient of variation (CV) of the  
422 interspike interval (ISI) during the plateau phase of stretch (1.5-3.5 s into the hold phase) across  
423 different stretch lengths and found a significant effect of genotype, with the knockout afferents  
424 both having higher ISI CV than the Nav1.1<sup>fl/fl</sup> afferents (**Fig 4D**;  $0.074 \pm 0.06$ ,  $0.313 \pm 0.456$ ,  $.497$   
425  $\pm .831$ , at 7.5% Lo, Nav1.1<sup>fl/fl</sup>, Nav1.1<sup>Het</sup>, and Nav1.1<sup>ckO</sup> afferents, respectively, Two-way ANOVA,  
426  $p = 0.015$ ). In contrast to the clear deficits in static sensitivity in afferents lacking Nav1.1, dynamic  
427 sensitivity was not significantly impaired. The maximum firing frequency during the ramp up phase  
428 (Dynamic Peak) was independent of genotype, and even trended slightly higher in afferents  
429 lacking Nav1.1 (**Fig 4E**; Two-way ANOVA, effect of genotype  $p=0.0633$ ). We next examined the  
430 requirement of Nav1.1 for proprioceptor afferent responses to sinusoidal vibration, which were  
431 similarly unchanged or enhanced (**Fig 5A-C, Tables 2-4**). We characterized a unit as having  
432 entrained to vibration if it fired at approximately the same time every cycle of the 9s vibration. In  
433 most cases, afferents lacking Nav1.1 were similarly or more likely to entrain to vibration than  
434 Nav1.1<sup>fl/fl</sup> afferents (**Fig 5C**). Indeed, Nav1.1<sup>ckO</sup> afferents were able to maintain firing during the  
435 entire 9 s sinusoidal vibration, in contrast to their inability to maintain consistent firing during static  
436 stretch. There were no significant differences in firing rate during vibration between Nav1.1<sup>fl/fl</sup>,

437  $Nav1.1^{Het}$ , and  $Nav1.1^{cKO}$  afferents. Thus,  $Nav1.1$  is required in proprioceptive afferents for normal  
 438 responses to static stimuli but is dispensable for afferent responsiveness to dynamic stimuli.

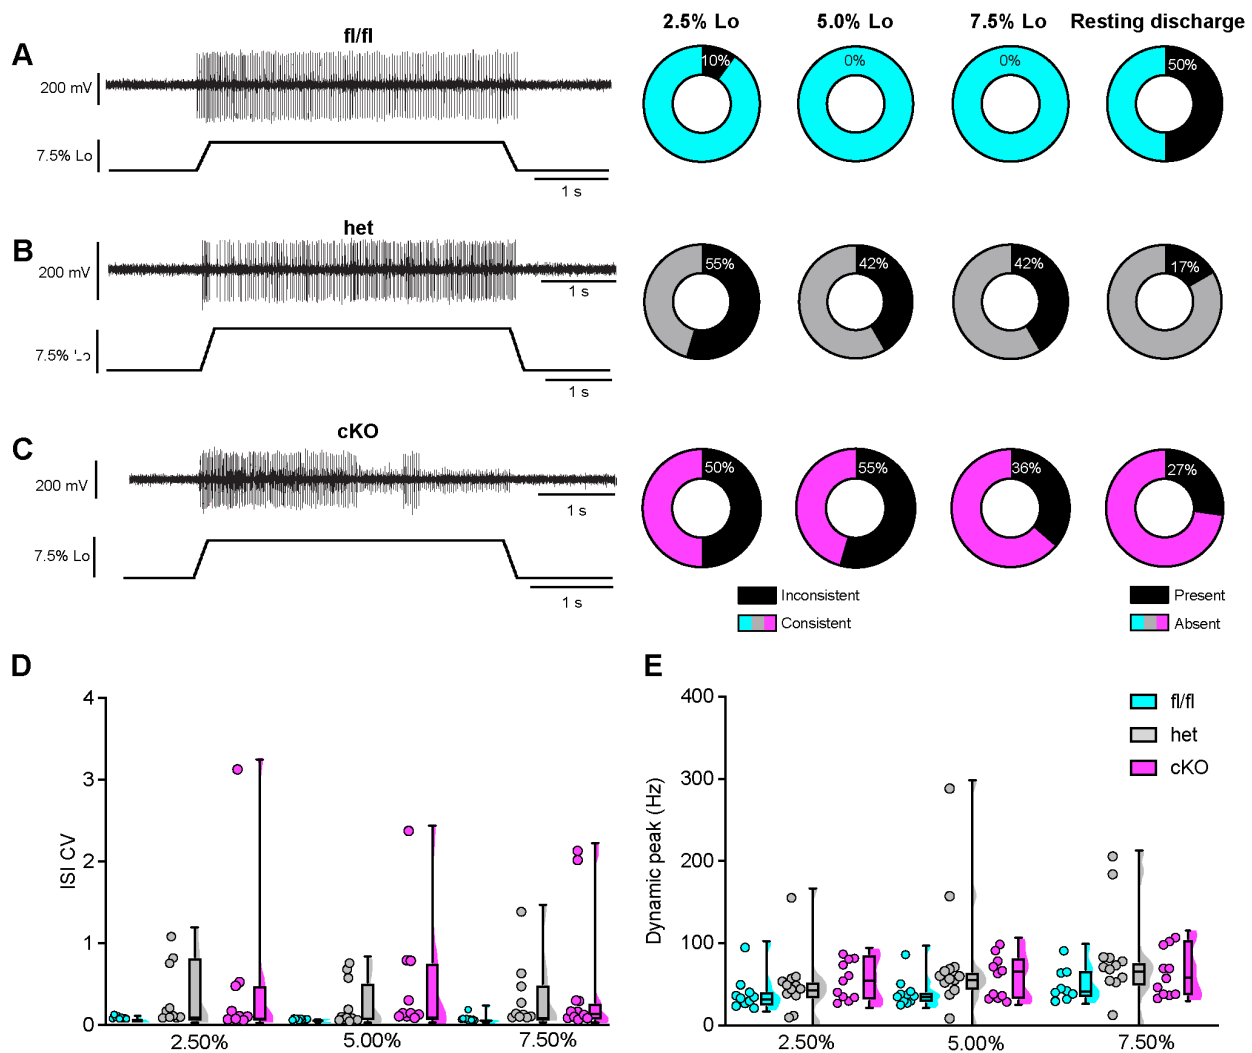

439

440 **Figure 4. Loss of  $Nav1.1$  reduces static muscle stretch sensitivity and reliability.** **A-C.** Representative responses  
 441 to ramp-and-hold muscle stretch at 7.5% of Lo from  $Nav1.1^{fl/fl}$  (**A**),  $Nav1.1^{Het}$  (**B**) and  $Nav1.1^{cKO}$  (**C**) afferents. Afferents  
 442 from  $Nav1.1^{Het}$  and  $Nav1.1^{cKO}$  mice were more likely to show inconsistent firing during the hold phase of stretch. The  
 443 percentage of afferents from each genotype that were able to fire consistently for the entire duration of stretch at 2.5%,  
 444 5.0%, and 7.5% of Lo are shown in the pie charts next to the representative trace from their genotype (black indicates  
 445 percentage with inconsistent firing). The final pie charts represent the proportion of afferents that exhibited resting  
 446 discharge at Lo for each genotype. **D.** Inconsistency in firing was quantified as the interspike interval coefficient of  
 447 variation (ISI CV) during the plateau stage of the hold phase of stretch (1.5-3.5s into stretch) for the 3 different  
 448 genotypes. A significant effect of genotype was observed (two-way mixed-design ANOVA,  $p=0.015$ ) **E.** The highest  
 449 firing rate during the ramp up phase of stretch (dynamic peak), which is a measure of dynamic sensitivity. No significant  
 450 effect of genotype was observed (two-way mixed-design ANOVA,  $p=0.0633$ ). Each dot represents one afferent  
 451 ( $Nav1.1^{fl/fl}$ ,  $n=10$ ;  $Nav1.1^{Het}$ ,  $n=12$ ;  $Nav1.1^{cKO}$ ,  $n=11$ ).

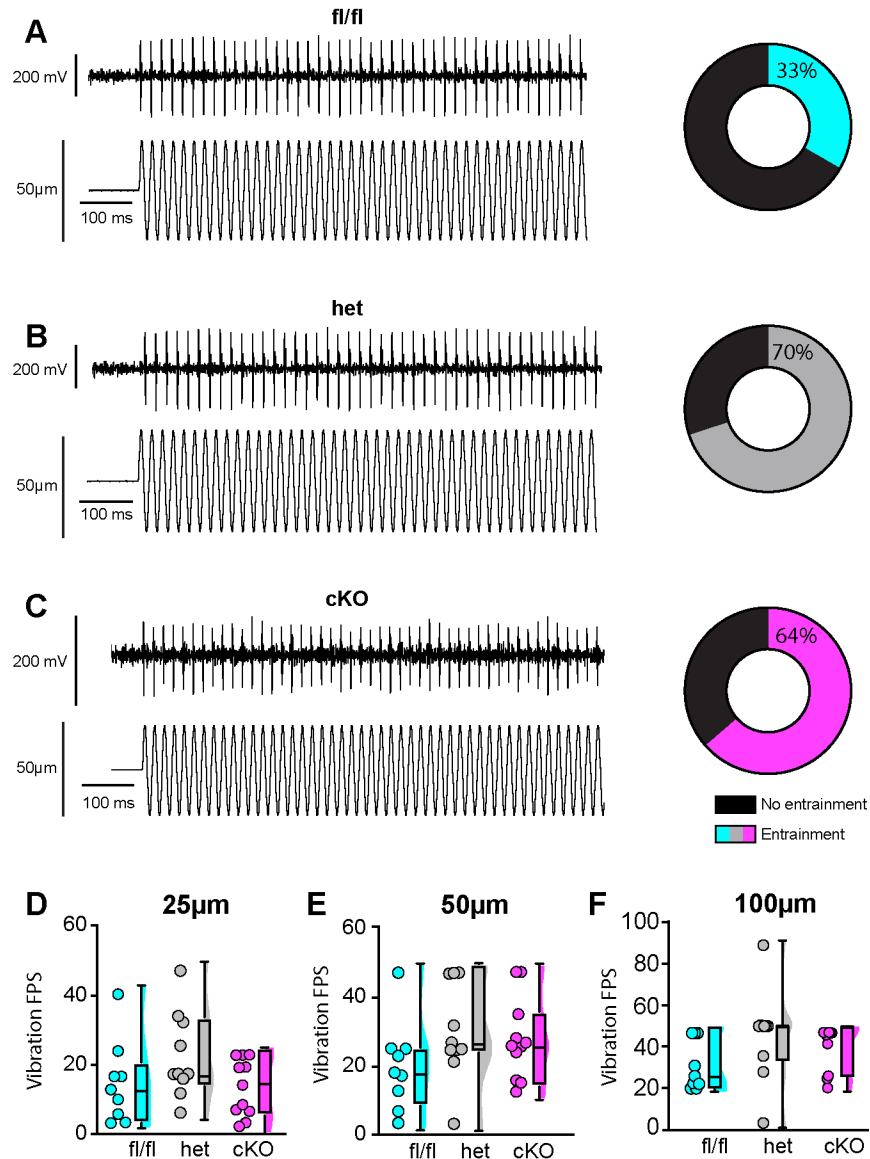

452

453 **Figure 5. Loss of  $Nav1.1$  does not alter muscle spindle afferent response to vibratory muscle stretch. A-C.**  
 454 Representative traces from afferents that were able to entrain to a 50Hz, 100μm vibration as well as graphs with the  
 455 percentage of all  $Nav1.1^{fl/fl}$  (cyan; **A**),  $Nav1.1^{Het}$  (gray; **B**), and  $Nav1.1^{cKO}$  (magenta; **C**) afferents that could entrain to  
 456 the vibration shown in **A-C**. Average firing frequency during a 9 s 50 Hz vibration shown for a 25 μm (**D**), 50 μm (**E**),  
 457 and 100 μm (**F**) amplitude vibration. There was no significant effect of genotype on the firing frequency during vibration  
 458 (25 μm,  $p = 0.2398$ , 50 μm,  $p = 0.2413$ , 100 μm,  $p = 0.1276$ ). A one-way ANOVA was used to determine statistical  
 459 significance in **D** and **E**. A Kruskal-Wallis test was used to determine statistical significance in **F**. Each dot represents  
 460 one afferent ( $Nav1.1^{fl/fl}$ ,  $n=9$ ;  $Nav1.1^{Het}$ ,  $n=10$ ;  $Nav1.1^{cKO}$ ,  $n=11$ ).

461

462

**Table 2. Afferent entrainment to 25 μm amplitude vibration**

| Genotype         | 10 Hz  | 25 Hz  | 50 Hz  | 100 Hz |
|------------------|--------|--------|--------|--------|
| $Nav1.1^{fl/fl}$ | 33.33% | 11.11% | 0.00%  | 0.00%  |
| $Nav1.1^{het}$   | 50.00% | 40.00% | 10.00% | 10.00% |

|                       |        |       |       |       |
|-----------------------|--------|-------|-------|-------|
| Nav1.1 <sup>ckO</sup> | 27.27% | 9.09% | 0.00% | 0.00% |
|-----------------------|--------|-------|-------|-------|

463 **Table 2.** The percentage of muscle spindle afferents that entrained to a 25 $\mu$ m amplitude sinusoidal vibration.

464

465

466

**Table 3. Afferent entrainment to 50  $\mu$ m amplitude vibration**

| Genotype                | 10 Hz  | 25 Hz  | 50 Hz  | 100 Hz |
|-------------------------|--------|--------|--------|--------|
| Nav1.1 <sup>fl/fl</sup> | 88.89% | 22.22% | 11.11% | 11.11% |
| Nav1.1 <sup>het</sup>   | 80.00% | 70.00% | 30.00% | 10.00% |
| Nav1.1 <sup>ckO</sup>   | 45.45% | 54.55% | 18.18% | 0.00%  |

467 **Table 3.** The percentage of muscle spindle afferents that entrained to a 50 $\mu$ m amplitude sinusoidal vibration.

468

469

470

**Table 4. Afferent entrainment to 100  $\mu$ m amplitude vibration**

| Genotype                | 10 Hz   | 25 Hz  | 50 Hz  | 100 Hz |
|-------------------------|---------|--------|--------|--------|
| Nav1.1 <sup>fl/fl</sup> | 100.00% | 44.44% | 33.33% | 22.22% |
| Nav1.1 <sup>het</sup>   | 90.00%  | 90.00% | 70.00% | 40.00% |
| Nav1.1 <sup>ckO</sup>   | 63.64%  | 72.73% | 63.64% | 18.18% |

471 **Table 4.** The percentage of muscle spindle afferents that entrained to a 100 $\mu$ m amplitude sinusoidal vibration.

472

473            Could reduced and inconsistent transmission of static stimuli in proprioceptors lead to a  
474 concomitant activity-dependent reduction in the number of mature proprioceptors? To address  
475 this question, we performed RNAscope analysis of DRG sections from Nav1.1<sup>fl/fl</sup>, Nav1.1<sup>Het</sup>, and  
476 Nav1.1<sup>ckO</sup> mice. We quantified the number of neurons per DRG section that were positive for both  
477 Runx3 and parvalbumin transcript, the molecular signature of mature proprioceptors (**Fig 6**, Oliver  
478 et al., 2021). We found no significant genotype-dependent differences in the number of  
479 proprioceptors in Nav1.1<sup>Het</sup> and Nav1.1<sup>ckO</sup> mice compared to Nav1.1<sup>fl/fl</sup> controls ( $p = 0.3824$  and  $p$   
480  $= 0.1665$ , respectively), indicating that the behavioral deficits observed in Nav1.1<sup>ckO</sup> mice are not  
481 the result of a developmental loss of proprioceptors. We also analyzed muscle spindle  
482 morphology to determine if aberrant sensory end organ development may contribute to the motor  
483 abnormalities of Nav1.1<sup>ckO</sup> mice. Similar to conditional Piezo2-knockout animals (Woo et al.,  
484 2015), no qualitative differences were observed between genotypes (**Supplementary Fig 3**).

485 Thus, abnormal proprioceptor development does not contribute to the overall phenotype of  
486 Nav1.1<sup>ckO</sup> mice.

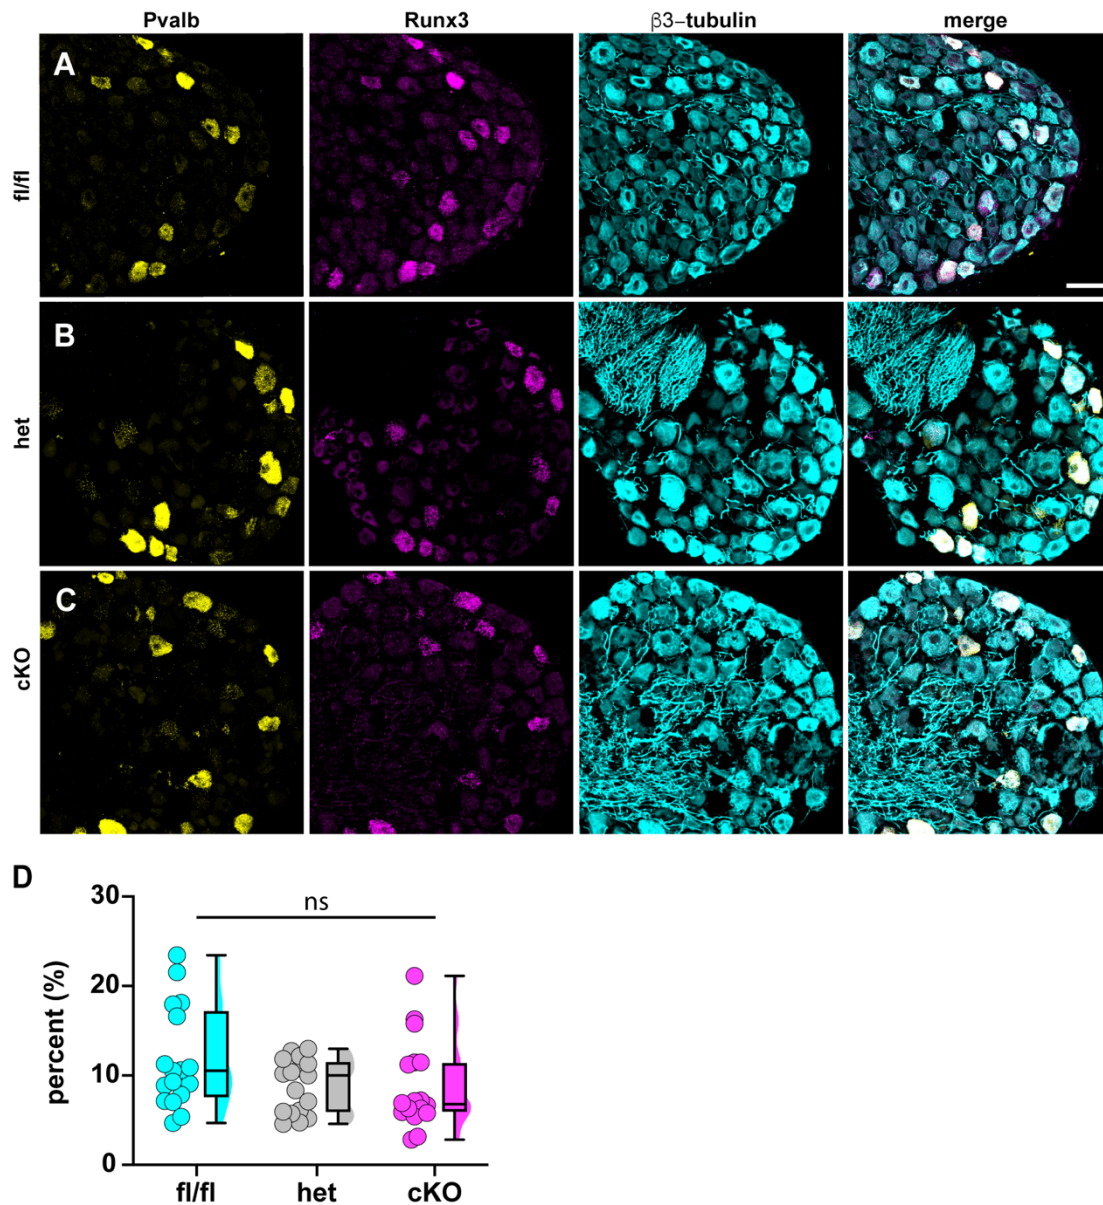

487

488 **Figure 6. Loss of Nav1.1 in sensory neurons does not affect proprioceptor development.** Representative images  
489 of Nav1.1<sup>fl/fl</sup> (A), Nav1.1<sup>het</sup> (B), and Nav1.1<sup>ckO</sup> (C) adult DRG neuron sections (25 μm). Images were acquired with a  
490 40X, 0.9 NA water-immersion objective. Sections were hybridized with probes targeting parvalbumin (*Pvalb*, yellow)  
491 and *Runx3* (magenta) and immunostained with anti-β3-tubulin (cyan). (D) Quantification of the percentage of  
492 Pvalb+/Runx3+ neurons in each genotype. Each dot represents one DRG section. A Kruskal-Wallis test with Dunn's  
493 post hoc comparison was used to determine statistical significance ( $p = 0.1971$ , Nav1.1<sup>fl/fl</sup> n=17, Nav1.1<sup>Het</sup> n=17,  
494 Nav1.1<sup>ckO</sup> n=18)). Scale bar 50μm.

495



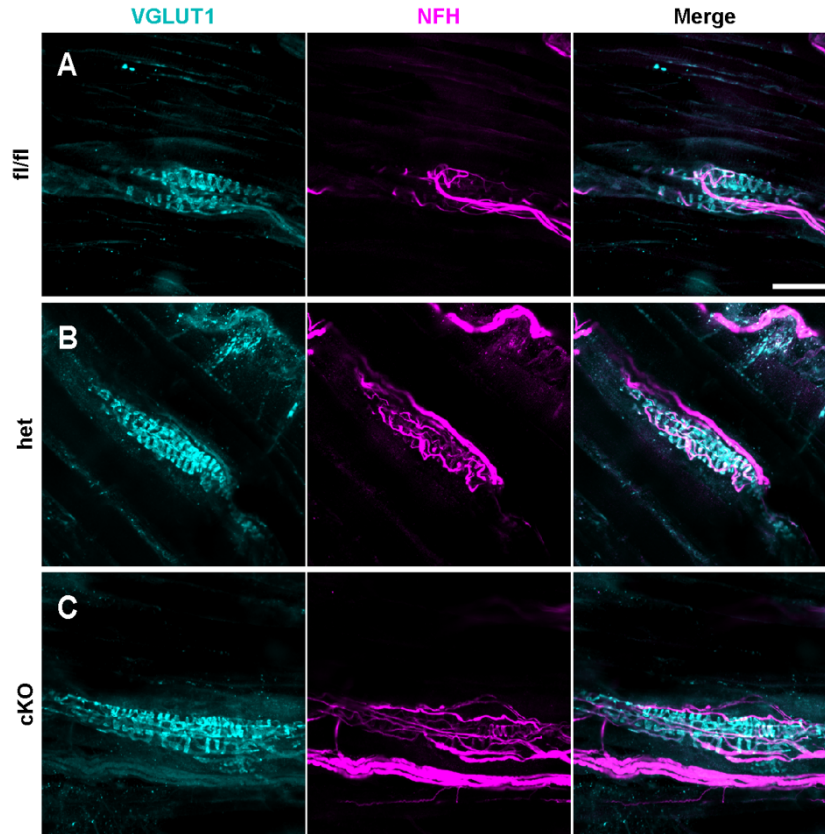

496

497 **Supplementary Figure 3. Muscle spindle development is normal in  $Nav_1.1^{Het}$  and  $Nav_1.1^{ckO}$  animals. A-C,**  
498 **Representative confocal images of muscle spindle whole mounts. Images were acquired with a 40x, 1.3 NA oil-**  
499 **immersion objective. Sections were stained using immunohistochemistry with VGLUT1 (cyan) and neurofilament heavy**  
500 **(NFH, magenta). (A) Representative images from  $Nav_1.1^{fl/fl}$  (B)  $Nav_1.1^{het}$  and (C)  $Nav_1.1^{ckO}$  mice.  $Nav_1.1^{fl/fl}$ , n=7,;**  
501  **$Nav_1.1^{Het}$ , n=8;  $Nav_1.1^{ckO}$ , n=9. Scale bar 50 $\mu$ m. n = muscle spindles.**  
502

503 We next asked whether reduced proprioceptor signaling decreased synaptic connectivity  
504 between proprioceptive axons and motor neurons in the spinal cord. Spinal cord sections were  
505 harvested from  $Nav_1.1^{fl/fl}$ ,  $Nav_1.1^{Het}$ , and  $Nav_1.1^{ckO}$  mice and stained with antibodies against  
506 vesicular glutamate transporter 1 (VGLUT1) and choline acetyltransferase (ChAT), to label  
507 proprioceptor axons and  $\alpha$ - motor neurons in the ventral horn, respectively. Our analysis found a  
508 significant decrease in VGLUT+ puncta per ChAT+ motor neuron in  $Nav_1.1^{ckO}$  mice compared to  
509  $Nav_1.1^{fl/fl}$  littermate controls (**Fig 7**,  $p = 0.0031$ ).  $Nav_1.1^{Het}$  mice showed no significant alterations  
510 in connectivity between VGLUT1+ proprioceptive terminals and ChAT+ motor neuron compared  
511 to  $Nav_1.1^{fl/fl}$  littermate controls ( $p = 0.7695$ ). Thus, in addition to decreased proprioceptive

512 transmission,  $Nav1.1^{cKO}$  mice also have reduced proprioceptor innervation of motor neurons,  
513 suggesting their behavioral deficits may also be due in part to aberrant signaling in the spinal  
514 cord.  
515

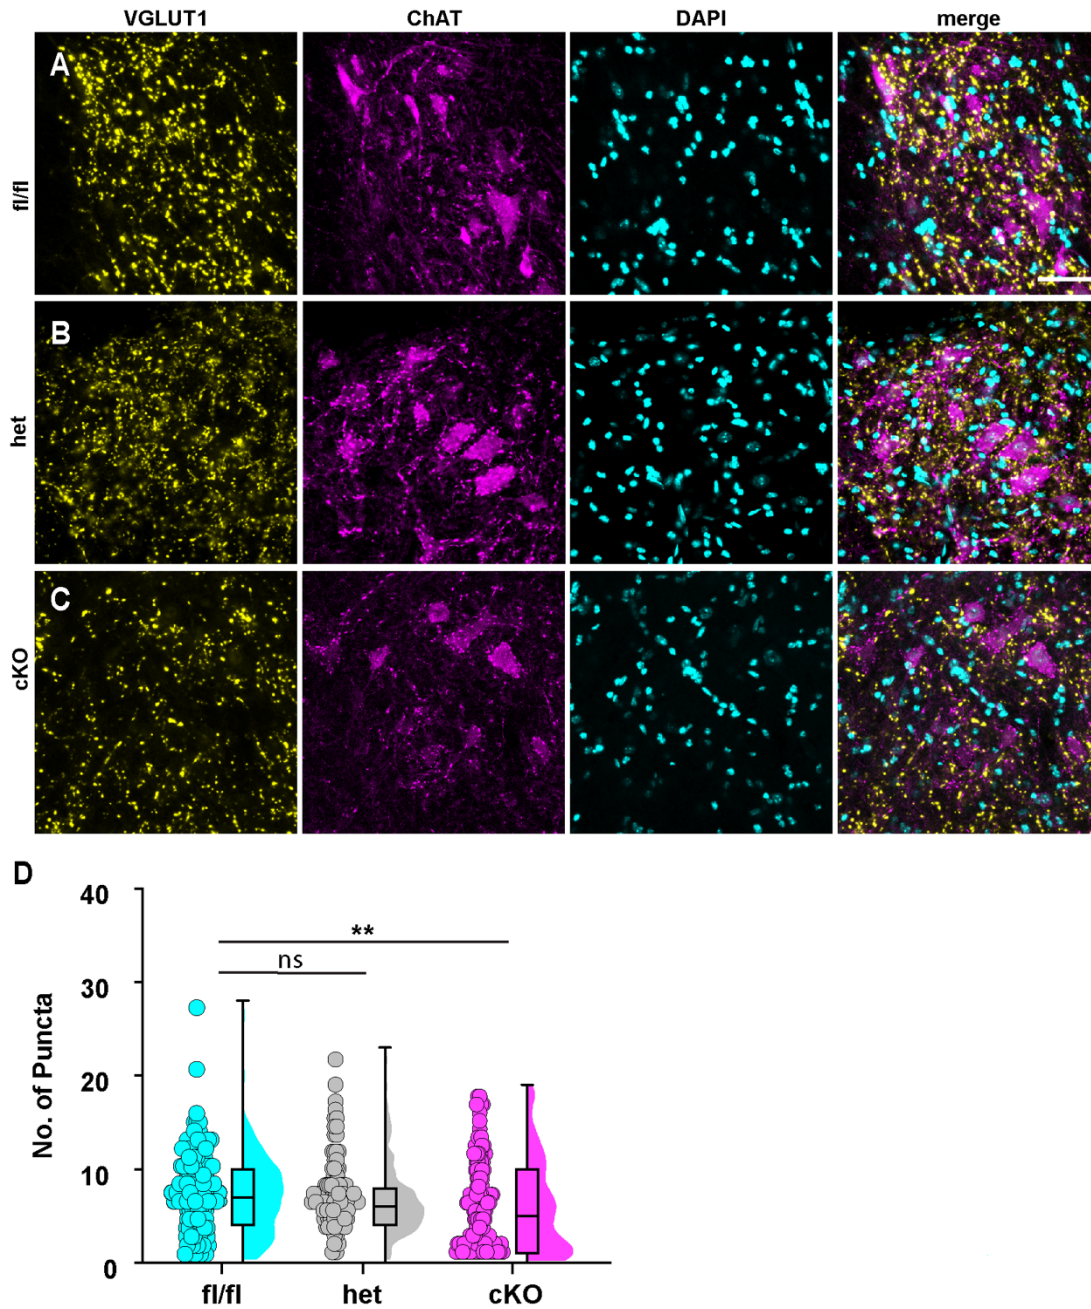

516

517 **Figure 7. Synaptic connectivity is reduced between proprioceptors and a-motor neurons in spinal cords of**  
518  **$Nav1.1^{cKO}$  mice. A-C, Representative images of  $Nav1.1^{fl/fl}$  (A),  $Nav1.1^{het}$  (B), and  $Nav1.1^{cKO}$  (C) adult spinal cord sections**

519 (30  $\mu\text{m}$ ). Images were acquired with a 63X, 1.4 NA oil-immersion objective. Sections were stained using  
520 immunocytochemistry with VGLUT1 (yellow) and ChAT (magenta). (D) Quantification of the number of VGLUT1+ puncta  
521 onto ChAT+ motor neurons. A Kruskal-Wallis test with Dunn's post hoc comparison was used to determine statistical  
522 significance ( $\text{Na}_v1.1^{\text{Het}}$ ,  $p=0.7695$ ,  $\text{Na}_v1.1^{\text{cKO}}$ ,  $p=0.0031$ ) Each dot represents a motor neuron.  $\text{Na}_v1.1^{\text{fl/fl}}$ ,  $n=127$ ;  
523  $\text{Na}_v1.1^{\text{Het}}$ ,  $n=99$ ;  $\text{Na}_v1.1^{\text{cKO}}$ ,  $n=119$ . Scale bar 50 $\mu\text{m}$ .  $n = \text{cells}$   
524

## 525 DISCUSSION

526 The critical role for  $\text{Na}_v1.1$  in various brain disorders has overshadowed the potential  
527 contributions of this channel in peripheral signaling. The results presented in this study are the  
528 first to provide functional evidence that  $\text{Na}_v1.1$  in peripheral sensory neurons is required for  
529 normal motor behaviors. We found that mice lacking  $\text{Na}_v1.1$  in sensory neurons exhibit visible  
530 motor deficits and ataxic-like behaviors, which were quantified in the rotarod and open field  
531 behavioral assays. We propose that this aberrant motor behavior is largely attributed to loss of  
532  $\text{Na}_v1.1$  in proprioceptors. Indeed, RNAscope analysis showed expression of  $\text{Na}_v1.1$  mRNA in  
533 100% of parvalbumin-positive DRG neurons. In line with this finding, our functional *in vitro* patch-  
534 clamp experiments show pharmacological inhibition of  $\text{Na}_v1.1$  in proprioceptors is sufficient to  
535 significantly attenuate action potential firing, likely due to  $\text{Na}_v1.1$  carrying nearly half of the  $I_{\text{Na}}$  in  
536 these cells. At the afferent level  $\text{Na}_v1.1^{\text{cKO}}$  and  $\text{Na}_v1.1^{\text{Het}}$  animals show clear deficits in static  
537 stretch sensitivity, but not dynamic sensitivity, and could even entrain to vibrations as fast as 100  
538 Hz, suggesting that  $\text{Na}_v1.1$  in proprioceptors is dispensable for encoding dynamic stimuli. Finally,  
539 we found that loss of  $\text{Na}_v1.1$  in sensory neurons had no effect on proprioceptor development or  
540 muscle spindle morphology; however, we did observe a significant reduction in proprioceptive  
541 afferent innervation of ChAT+ motor neurons in the spinal cord. Thus, the observed motor deficits  
542 are likely due to a combination of reduced static sensitivity of proprioceptor afferents and a  
543 concomitant activity-dependent loss of motor neuron innervation.

544 Our model proposes that  $\text{Na}_v1.1$  is tasked with maintaining consistent firing in  
545 proprioceptors during static muscle stretch for normal motor behaviors, whereby activation of the  
546 mechanotransduction channel Piezo2 initiates electrical signaling, which in turn activates a  
547 complement of tetrodotoxin-sensitive  $\text{Na}_v$  channels (Carrasco et al., 2017; Florez-Paz et al., 2016;



548 Woo et al., 2015, **Fig 8**). During dynamic or vibratory stimuli, Piezo2, and likely a combination of  
549 other molecular mediators, including Nav1.6 and Nav1.7, are sufficient to elicit normal electrical  
550 activity. Conversely, during prolonged muscle stretch when Piezo2 channels presumably  
551 inactivate, Nav1.1 is required for regular and reliable firing. In the absence of functional Nav1.1  
552 channels, inconsistent proprioceptor firing leads to a decrease in synaptic connectivity in the  
553 spinal cord between proprioceptors and motor neurons, likely exacerbating motor deficits. While  
554 other signaling molecules and channels, such as vesicle-released glutamate (Bewick et al., 2005;  
555 Than et al., 2021), and mechanosensitive ASIC channels (Lin et al., 2016) and ENaC channels  
556 (Bewick and Banks, 2015), also contribute to mammalian proprioception, our data suggests  
557 Nav1.1 is a critical for muscle spindle mechanotransduction, given the overt behavioral deficits  
558 observed in Nav1.1<sup>CKO</sup> mice.

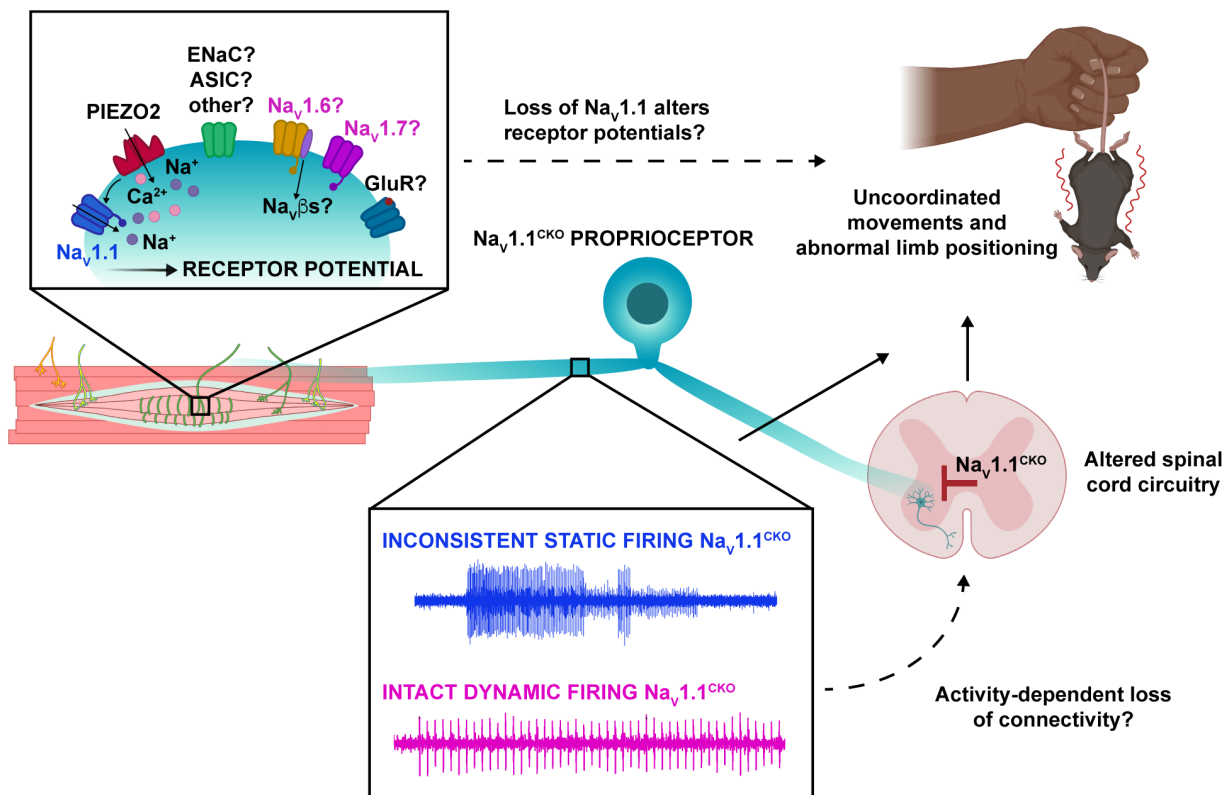

559

560 **Figure 8. Proposed model of the role of Nav1.1 in proprioception.** Upon muscle static stretch, various channels  
561 activate, including Piezo2 (red) which results in an influx of calcium and sodium ions, causing a depolarization that  
562 activates Nav1.1 (dark blue). Nav1.1 activation drives reliable repetitive firing of proprioceptors during static stretch for  
563 normal motor behavior. Loss of Nav1.1 in sensory neurons results in inconsistent static firing at the afferent level while

564 maintaining dynamic firing. It is possible that a combination of Piezo2, Nav<sub>v</sub>1.6 (yellow) , Nav<sub>v</sub>1.7 (pink), and/or other  
565 channels, such as glutamate receptors, Asic channels, and ENaC, mediate dynamic firing. Unreliable signaling may  
566 alter spinal cord circuitry through an activity-dependent loss of synaptic connectivity, resulting in uncoordinated  
567 movements and abnormal limb positioning.  
568

569 To date, our knowledge of the functional contributions of Nav<sub>v</sub>1.1 in the PNS is limited.  
570 Most studies have identified roles for this channel in mechanical pain signaling in DRG, TG, and  
571 vagal sensory neurons. Intraplantar pharmacological activation of Nav<sub>v</sub>1.1 induces spontaneous  
572 pain behaviors and mechanical pain, which is absent in mice lacking Nav<sub>v</sub>1.1 in small- and  
573 medium-diameter sensory neurons (Osteen et al., 2016). Inhibition of Nav<sub>v</sub>1.1 prevented the  
574 development of mechanical pain in several preclinical models, including spared nerve injury  
575 (Salvatierra et al., 2018b), an irritable bowel syndrome mouse model (Salvatierra et al., 2018),  
576 and infraorbital nerve chronic constriction injury (Pineda-Farias et al., 2021). Additionally, blocking  
577 Nav<sub>v</sub>1.1 channels inhibited firing in TRPM8-expressing neurons *in vitro*, suggesting a potential role  
578 for this channel in thermosensation (Griffith et al., 2019). No prior studies, however, have reported  
579 a role for Nav<sub>v</sub>1.1 in proprioceptor function or motor behaviors.

580 The biophysical properties of Nav<sub>v</sub>1.1 within the mammalian muscle spindle may help drive  
581 static stretch induced action potential firing in proprioceptors. Indeed, the loss of consistent firing  
582 we observed during static stretch in Nav<sub>v</sub>1.1<sup>ckO</sup> animals is functionally similar to loss of Nav<sub>v</sub>1.1 in  
583 other brain cell types. Loss of a single copy of Nav<sub>v</sub>1.1 is sufficient to attenuate sustained action  
584 potential firing in parvalbumin-positive hippocampal interneurons (Ogiwara et al., 2007; Yu et al.,  
585 2006) and cerebellar Purkinje neurons (Yu et al., 2006). Mechanistically, Nav<sub>v</sub>1.1 might contribute  
586 to sustained firing in two distinct ways. First, Nav<sub>v</sub>1.1 has been associated with persistent sodium  
587 current (I<sub>NaP</sub>) and resurgent sodium current (I<sub>NaR</sub>), both of which promote repetitive firing in a wide  
588 variety of cell types in the CNS and PNS (Barbosa et al., 2015; Kalume et al., 2007; Khaliq et al.,  
589 2003). Second, Nav<sub>v</sub>1.1 recovers rapidly from fast inactivation compared to other channel  
590 subtypes (Herzog et al., 2003; Patel et al., 2015) and has been shown to be refractory to entry  
591 into slow inactivation in TRPM8-expressing DRG neurons (Griffith et al., 2019). Thus, it is possible

592 that proprioceptors rely on these features of Nav1.1 for reliable and consistent firing in response  
593 to static stretch.

594         Loss of Nav1.1 notably impacted proprioceptor afferent static sensitivity during ramp-and-  
595 hold stretch, but not dynamic sensitivity as measured by entrainment to sinusoidal vibrations using  
596 *ex vivo* muscle-nerve recordings. Afferents from Nav1.1<sup>ckO</sup> animals were more likely to have  
597 failures and thus were mostly unable to fire consistently throughout the 4 s of stretch, which was  
598 accompanied by a higher coefficient of variability in the ISI. This is consistent with Nav1.1 playing  
599 a critical role in transmitting static stretch information to the central nervous system. Interestingly,  
600 however, dynamic sensitivity in these afferents appears to be enhanced, or at least unimpaired.  
601 Though not statistically significant, Nav1.1<sup>ckO</sup> afferents were more likely to entrain throughout the  
602 entire 9 s vibration compared to control mice. Therefore, Nav1.1<sup>ckO</sup> afferents don't have a  
603 generalized inability to maintain high frequency firing, but a more specific deficit in static  
604 sensitivity. Nav1.1 has been localized to muscle spindle afferent endings (Carrasco et al., 2017)  
605 and has been hypothesized to help amplify receptor current. Our results support a model whereby  
606 current via Piezo2 and potentially other mechanically sensitive ion channels at the start of stretch  
607 produces a sufficient receptor potential to generate firing at the heminode, but that amplification  
608 of the receptor potential by Nav1.1 is necessary to maintain firing during held stretch. A similar  
609 deficit in static but not dynamic sensitivity was seen following loss of synaptic-like vesicle released  
610 glutamate from afferent endings (Than et al., 2021); however in those afferents firing only  
611 occurred at the beginning of stretch and patchy firing was never observed. This may indicate that  
612 glutamate plays a more general role maintaining excitability, whereas Nav1.1 is required for  
613 reliable action potential generation at heminodes during static stimuli. Alternatively, or in addition,  
614 Nav1.1 expressed along the axon could be essential for sustained static firing. A detailed  
615 examination of Nav1.1 subcellular localization along proprioceptor afferents could shed light on  
616 how this channel contributes to signal propagation. The observed trend towards increased

617 dynamic sensitivity, especially in Nav1.1<sup>Het</sup> animals, could suggest the upregulation of other Nav  
618 subtypes or other molecules as a compensatory mechanism to counteract the loss of Nav1.1.  
619 Future studies using temporally controlled deletion of Nav1.1 in sensory neurons could tease this  
620 apart. Nevertheless, as static sensitivity is still very much impaired in Nav1.1<sup>ckO</sup> afferents, Nav1.1  
621 may play a potentially unique role in maintaining afferent firing during the sustained stretch.

622         Although though the response patterns of Nav1.1<sup>Het</sup> and Nav1.1<sup>ckO</sup> afferents were similar,  
623 behavioral deficits were much more striking in Nav1.1<sup>ckO</sup> mice (**Fig 4**). One potential explanation  
624 is the significant decrease in Group Ia proprioceptor synapses (VGLUT1+) on  $\alpha$ -motor neurons  
625 observed in Nav1.1<sup>ckO</sup> animals but not in Nav1.1<sup>Het</sup> mice. Nerve injury can permanently reduce  
626 VGLUT1 synapses on motor neurons (Alvarez et al., 2011), suggesting they may be particularly  
627 sensitive to changes in excitability. Given the similar deficits in static stretch sensitivity between  
628 these two genotypes, however, it is unclear why Nav1.1<sup>Het</sup> mice maintain normal synaptic  
629 connectivity between proprioceptive afferents and  $\alpha$ -motor neurons. Nav1.1<sup>Het</sup> afferents trended  
630 toward having increased dynamic sensitivity, making it is possible that this is sufficient to protect  
631 from an activity-dependent loss of motor neuron innervation. Another explanation is a presynaptic  
632 role of Nav1.1 in proprioceptive terminals that is unveiled when both copies of Nav1.1 are lost.  
633 For example, loss of presynaptic Nav1.7 channels in the spinal cord reduced glutamate release  
634 from nociceptive afferents onto dorsal horn neurons (MacDonald et al., 2021). If a similar  
635 mechanism is at play for Nav1.1 in proprioceptors, reduced release from afferent terminals could  
636 lead to homeostatic changes in connectivity with post-synaptic motor neurons. Future studies are  
637 required to test this possibility.

638         We observed effects of both pharmacological inhibition and genetic deletion of Nav1.1 in  
639 *in vitro* and *ex vivo* electrophysiological experiments, respectively (**Figs 2-3, 5**); however, in our  
640 mouse model Nav1.1 is deleted in all sensory neurons. Thus, we cannot rule out that loss of  
641 Nav1.1 in other mechanosensory neuron populations contributes to the motor deficits observed.

642 Deletion of Nav1.1 in small- and medium-diameter DRG neurons did not produce visible motor  
643 deficits (Osteen et al., 2016), indicating sensory neuron populations in those categories are not  
644 involved. We did observe Nav1.1 transcripts in the vast majority of myelinated DRG neurons (a  
645 combination of large- and medium-diameter DRG neurons), consistent with its presence in  
646 different subclasses of tactile sensory neurons (Zheng et al., 2019). However, the severe motor  
647 phenotype of Nav1.1<sup>ckO</sup> mice precludes mechanical threshold analysis using von Frey or tactile  
648 sensitivity using tape test. Notably, baseline mechanical thresholds were unchanged following  
649 intraplantar injection of a selective Nav1.1 inhibitor (Salvatierra et al., 2018). This suggests that  
650 while Nav1.1 mRNA is expressed in most tactile sensory neurons, functional protein may only be  
651 upregulated in these populations during pathological states.

652 Despite this limitation, one noteworthy and intriguing finding from our study was the  
653 haploinsufficiency of Nav1.1 in sensory neurons for normal motor behavior in the open field test.  
654 Nav1.1<sup>Het</sup> mice had an identical phenotype to Nav1.1<sup>ckO</sup> mice, moving more slowly and less than  
655 controls, despite not having the more severe and visible motor coordination deficits. Indeed, their  
656 performance on the rotarod was identical to that of Nav1.1<sup>fl/fl</sup> controls. The gene encoding Nav1.1,  
657 *Scn1a*, is a super culprit gene with over one thousand associated disease-causing mutations,  
658 most of which are linked to different forms of epilepsy. Many epilepsy patients with hemizygous  
659 Nav1.1 loss-of-function display ataxia and motor delays and deficiencies (Claes et al., 2001;  
660 Fujiwara et al., 2003), which has traditionally been attributed to loss of Nav1.1 function in the  
661 brain, namely the cerebellum (Kalume et al., 2007). Our findings suggest that some of the clinical  
662 manifestations associated with epilepsy are not solely due to Nav1.1 loss-of-function in the brain,  
663 but also may manifest in part as a result from unreliable coding by peripheral proprioceptors.

664 Data presented in this study provide new evidence of a role for peripherally expressed  
665 Nav1.1 in motor coordination. We show that Nav1.1 is ubiquitously expressed in mammalian  
666 proprioceptors, contributes to proprioceptor excitability *in vitro* and *ex vivo*, and is required in

667 sensory neurons for normal spinal cord motor circuit development. Collectively, this works  
668 identifies a new role for Nav1.1 in peripheral sensory neuron physiology and motor behaviors.

669

#### 670 **AUTHOR CONTRIBUTIONS**

671 CME performed immunohistochemistry and voltage-clamp experiments. CML performed  
672 RNAscope experiments. SO performed *ex vivo* electrophysiology experiments. MSD performed  
673 behavioral experiments. KMW and DAO performed current clamp experiments. CME, CML, SO,  
674 KMW, and DAO conducted data analysis. TNG and KAW assisted with data analysis and  
675 experimental design. CME and CML made the figures. TNG wrote the first draft of the manuscript.  
676 CME, CML, and KAW assisted with writing and editing the manuscript. All authors approved the  
677 manuscript. TNG, CME, and KAW acquired funding, and TNG and KAW supervised the project.

678

#### 679 **DATA AVAILABILITY**

680 All data generated or analyzed during this study are included in the manuscript and supporting  
681 file; Source Data files have been uploaded to Mendeley for all figures (doi:  
682 10.17632/kt23th75v9.2). Code has been uploaded to GitHub  
683 ([https://github.com/doctheagrif/Current-Clamp-Matlab-Code\\_O-Neil-DA](https://github.com/doctheagrif/Current-Clamp-Matlab-Code_O-Neil-DA)). A key resources table  
684 with specific organism and reagent information has been included in the methods section.

685

686 **REFERENCES**

687

688 Ahern CA, Payandeh J, Bosmans F, Chanda B. 2016. The hitchhiker's guide to the voltage-gated  
689 sodium channel galaxy. *J Gen Physiol* **147**:1–24. doi:10.1085/jgp.201511492

690 Alvarez FJ, Titus-Mitchell HE, Bullinger KL, Kraszpulski M, Nardelli P, Cope TC. 2011. Permanent  
691 central synaptic disconnection of proprioceptors after nerve injury and regeneration. I. Loss of  
692 VGLUT1/IA synapses on motoneurons. *J Neurophysiol* **106**:2450–2470.  
693 doi:10.1152/jn.01095.2010

694 Aman TK, Grieco-Calub TM, Chen C, Rusconi R, Slat EA, Isom LL, Raman IM. 2009. Regulation  
695 of persistent Na current by interactions between beta subunits of voltage-gated Na channels. *J*  
696 *Neurosci* **29**:2027–2042. doi:10.1523/JNEUROSCI.4531-08.2009

697 Barbosa C, Tan Z-Y, Wang R, Xie W, Strong JA, Patel RR, Vasko MR, Zhang J-M, Cummins TR.  
698 2015. Navβ4 regulates fast resurgent sodium currents and excitability in sensory neurons. *Mol*  
699 *Pain* **11**:60. doi:10.1186/s12990-015-0063-9

700 Bean BP. 2007. The action potential in mammalian central neurons. *Nat Rev Neurosci* **8**:451–  
701 465. doi:10.1038/nrn2148

702 Bennett DL, Clark AJ, Huang J, Waxman SG, Dib-Hajj SD. 2019. The Role of Voltage-Gated  
703 Sodium Channels in Pain Signaling. *Physiol Rev* **99**:1079–1151.  
704 doi:10.1152/physrev.00052.2017

705 Bewick GS, Banks RW. 2015. Mechanotransduction in the muscle spindle. *Pflugers Arch*  
706 **467**:175–190. doi:10.1007/s00424-014-1536-9

707 Bewick GS, Reid B, Richardson C, Banks RW. 2005. Autogenic modulation of mechanoreceptor  
708 excitability by glutamate release from synaptic-like vesicles: evidence from the rat muscle spindle  
709 primary sensory ending. *J Physiol* **562**:381–394. doi:10.1113/jphysiol.2004.074799

- 710 Carrasco DI, Vincent JA, Cope TC. 2017. Distribution of TTX-sensitive voltage-gated sodium  
711 channels in primary sensory endings of mammalian muscle spindles. *J Neurophysiol* **117**:1690–  
712 1701. doi:10.1152/jn.00889.2016
- 713 Catterall WA. 2017. Forty Years of Sodium Channels: Structure, Function, Pharmacology, and  
714 Epilepsy. *Neurochem Res* **42**:2495–2504. doi:10.1007/s11064-017-2314-9
- 715 Chang W, Berta T, Kim YH, Lee S, Lee S-Y, Ji R-R. 2018. Expression and Role of Voltage-Gated  
716 Sodium Channels in Human Dorsal Root Ganglion Neurons with Special Focus on Nav1.7,  
717 Species Differences, and Regulation by Paclitaxel. *Neurosci Bull* **34**:4–12. doi:10.1007/s12264-  
718 017-0132-3
- 719 Claes L, Del-Favero J, Ceulemans B, Lagae L, Van Broeckhoven C, De Jonghe P. 2001. De novo  
720 mutations in the sodium-channel gene SCN1A cause severe myoclonic epilepsy of infancy. *Am J*  
721 *Hum Genet* **68**:1327–1332. doi:10.1086/320609
- 722 de Nooij JC, Doobar S, Jessell TM. 2013. Etv1 inactivation reveals proprioceptor subclasses that  
723 reflect the level of NT3 expression in muscle targets. *Neuron* **77**:1055–1068.  
724 doi:10.1016/j.neuron.2013.01.015
- 725 Ding J, Li X, Tian H, Wang L, Guo B, Wang Y, Li W, Wang F, Sun T. 2021. SCN1A Mutation-  
726 Beyond Dravet Syndrome: A Systematic Review and Narrative Synthesis. *Front Neurol*  
727 **12**:743726. doi:10.3389/fneur.2021.743726
- 728 Escayg A, Goldin AL. 2010. Sodium channel SCN1A and epilepsy: mutations and mechanisms.  
729 *Epilepsia* **51**:1650–1658. doi:10.1111/j.1528-1167.2010.02640.x
- 730 Felts PA, Yokoyama S, Dib-Hajj S, Black JA, Waxman SG. 1997. Sodium channel alpha-subunit  
731 mRNAs I, II, III, NaG, Na6 and hNE (PN1): different expression patterns in developing rat nervous  
732 system. *Brain Res Mol Brain Res* **45**:71–82. doi:10.1016/s0169-328x(96)00241-0



- 733 Florez-Paz D, Bali KK, Kuner R, Gomis A. 2016. A critical role for Piezo2 channels in the  
734 mechanotransduction of mouse proprioceptive neurons. *Sci Rep* **6**:25923.  
735 doi:10.1038/srep25923
- 736 Fujiwara T, Sugawara T, Mazaki-Miyazaki E, Takahashi Y, Fukushima K, Watanabe M, Hara K,  
737 Morikawa T, Yagi K, Yamakawa K, Inoue Y. 2003. Mutations of sodium channel alpha subunit  
738 type 1 (SCN1A) in intractable childhood epilepsies with frequent generalized tonic-clonic seizures.  
739 *Brain J Neurol* **126**:531–546. doi:10.1093/brain/awg053
- 740 Fukuoka T, Kobayashi K, Yamanaka H, Obata K, Dai Y, Noguchi K. 2008. Comparative study of  
741 the distribution of the alpha-subunits of voltage-gated sodium channels in normal and axotomized  
742 rat dorsal root ganglion neurons. *J Comp Neurol* **510**:188–206. doi:10.1002/cne.21786
- 743 Griffith TN, Docter TA, Lumpkin EA. 2019. Tetrodotoxin-Sensitive Sodium Channels Mediate  
744 Action Potential Firing and Excitability in Menthol-Sensitive Vglut3-Lineage Sensory Neurons. *J*  
745 *Neurosci* **39**:7086–7101. doi:10.1523/JNEUROSCI.2817-18.2019
- 746 He X-H, Zang Y, Chen X, Pang R-P, Xu J-T, Zhou X, Wei X-H, Li Y-Y, Xin W-J, Qin Z-H, Liu X-  
747 G. 2010. TNF- $\alpha$  contributes to up-regulation of Nav1.3 and Nav1.8 in DRG neurons following  
748 motor fiber injury. *Pain* **151**:266–279. doi:10.1016/j.pain.2010.06.005
- 749 Herzog RI, Cummins TR, Ghassemi F, Dib-Hajj SD, Waxman SG. 2003. Distinct repriming and  
750 closed-state inactivation kinetics of Nav1.6 and Nav1.7 sodium channels in mouse spinal sensory  
751 neurons. *J Physiol* **551**:741–750. doi:10.1113/jphysiol.2003.047357
- 752 Ho C, O’Leary ME. 2011. Single-cell analysis of sodium channel expression in dorsal root  
753 ganglion neurons. *Mol Cell Neurosci* **46**:159–166. doi:10.1016/j.mcn.2010.08.017
- 754 Kalume F, Yu FH, Westenbroek RE, Scheuer T, Catterall WA. 2007. Reduced sodium current in  
755 Purkinje neurons from Nav1.1 mutant mice: implications for ataxia in severe myoclonic epilepsy  
756 in infancy. *J Neurosci* **27**:11065–11074. doi:10.1523/JNEUROSCI.2162-07.2007

- 757 Khaliq ZM, Gouwens NW, Raman IM. 2003. The contribution of resurgent sodium current to high-  
758 frequency firing in Purkinje neurons: an experimental and modeling study. *J Neurosci* **23**:4899–  
759 4912.
- 760 Kim AY, Tang Z, Liu Q, Patel KN, Maag D, Geng Y, Dong X. 2008. Pirt, a phosphoinositide-  
761 binding protein, functions as a regulatory subunit of TRPV1. *Cell* **133**:475–485.  
762 doi:10.1016/j.cell.2008.02.053
- 763 Kupari J, Usoskin D, Parisien M, Lou D, Hu Y, Fatt M, Lönnerberg P, Spångberg M, Eriksson B,  
764 Barkas N, Kharchenko PV, Loré K, Khoury S, Diatchenko L, Ernfors P. 2021. Single cell  
765 transcriptomics of primate sensory neurons identifies cell types associated with chronic pain. *Nat*  
766 *Commun* **12**:1510. doi:10.1038/s41467-021-21725-z
- 767 Lin S-H, Cheng Y-R, Banks RW, Min M-Y, Bewick GS, Chen C-C. 2016. Evidence for the  
768 involvement of ASIC3 in sensory mechanotransduction in proprioceptors. *Nat Commun* **7**:11460.  
769 doi:10.1038/ncomms11460
- 770 Lossin C. 2009. A catalog of SCN1A variants. *Brain Dev* **31**:114–130.  
771 doi:10.1016/j.braindev.2008.07.011
- 772 MacDonald DI, Sikandar S, Weiss J, Pyrski M, Luiz AP, Millet Q, Emery EC, Mancini F, Iannetti  
773 GD, Alles SRA, Arcangeletti M, Zhao J, Cox JJ, Brownstone RM, Zufall F, Wood JN. 2021. A  
774 central mechanism of analgesia in mice and humans lacking the sodium channel NaV1.7. *Neuron*  
775 **109**:1497-1512.e6. doi:10.1016/j.neuron.2021.03.012
- 776 Madisen L, Zwingman TA, Sunkin SM, Oh SW, Zariwala HA, Gu H, Ng LL, Palmiter RD,  
777 Hawrylycz MJ, Jones AR, Lein ES, Zeng H. 2010. A robust and high-throughput Cre reporting  
778 and characterization system for the whole mouse brain. *Nat Neurosci* **13**:133–140.  
779 doi:10.1038/nn.2467

- 780 Mulley JC, Scheffer IE, Petrou S, Dibbens LM, Berkovic SF, Harkin LA. 2005. SCN1A mutations  
781 and epilepsy. *Hum Mutat* **25**:535–542. doi:10.1002/humu.20178
- 782 Nguyen MQ, von Buchholtz LJ, Reker AN, Ryba NJ, Davidson S. 2021. Single-nucleus  
783 transcriptomic analysis of human dorsal root ganglion neurons. *eLife* **10**:e71752.  
784 doi:10.7554/eLife.71752
- 785 Ogiwara I, Miyamoto H, Morita N, Atapour N, Mazaki E, Inoue I, Takeuchi T, Itohara S, Yanagawa  
786 Y, Obata K, Furuichi T, Hensch TK, Yamakawa K. 2007. Nav1.1 localizes to axons of  
787 parvalbumin-positive inhibitory interneurons: a circuit basis for epileptic seizures in mice carrying  
788 an Scn1a gene mutation. *J Neurosci* **27**:5903–5914. doi:10.1523/JNEUROSCI.5270-06.2007
- 789 Oliver KM, Florez-Paz DM, Badea TC, Mentis GZ, Menon V, de Nooij JC. 2021. Molecular  
790 correlates of muscle spindle and Golgi tendon organ afferents. *Nat Commun* **12**:1451.  
791 doi:10.1038/s41467-021-21880-3
- 792 Osteen JD, Herzig V, Gilchrist J, Emrick JJ, Zhang C, Wang X, Castro J, Garcia-Caraballo S,  
793 Grundy L, Rychkov GY, Weyer AD, Dekan Z, Undheim EAB, Alewood P, Stucky CL, Brierley SM,  
794 Basbaum AI, Bosmans F, King GF, Julius D. 2016. Selective spider toxins reveal a role for the  
795 Nav1.1 channel in mechanical pain. *Nature* **534**:494–499. doi:10.1038/nature17976
- 796 Patel RR, Barbosa C, Xiao Y, Cummins TR. 2015. Human Nav1.6 Channels Generate Larger  
797 Resurgent Currents than Human Nav1.1 Channels, but the Nav $\beta$ 4 Peptide Does Not Protect  
798 Either Isoform from Use-Dependent Reduction. *PLoS One* **10**:e0133485.  
799 doi:10.1371/journal.pone.0133485
- 800 Pineda-Farias JB, Loeza-Alcocer E, Nagarajan V, Gold MS, Sekula RF. 2021. Mechanisms  
801 Underlying the Selective Therapeutic Efficacy of Carbamazepine for Attenuation of Trigeminal  
802 Nerve Injury Pain. *J Neurosci* **41**:8991–9007. doi:10.1523/JNEUROSCI.0547-21.2021

- 803 Salvatierra J, Castro J, Erickson A, Li Q, Braz J, Gilchrist J, Grundy L, Rychkov GY, Deiteren A,  
804 Rais R, King GF, Slusher BS, Basbaum A, Pasricha PJ, Brierley SM, Bosmans F. 2018. Nav1.1  
805 inhibition can reduce visceral hypersensitivity. *JCI Insight* **3**:121000.  
806 doi:10.1172/jci.insight.121000
- 807 Sharma N, Flaherty K, Lezgiyeva K, Wagner DE, Klein AM, Ginty DD. 2020. The emergence of  
808 transcriptional identity in somatosensory neurons. *Nature* **577**:392–398. doi:10.1038/s41586-019-  
809 1900-1
- 810 Than K, Kim E, Navarro C, Chu S, Klier N, Occiano A, Ortiz S, Salazar A, Valdespino SR, Villegas  
811 NK, Wilkinson KA. 2021. Vesicle-released glutamate is necessary to maintain muscle spindle  
812 afferent excitability but not dynamic sensitivity in adult mice. *J Physiol* **599**:2953–2967.  
813 doi:10.1113/JP281182
- 814 Usoskin D, Furlan A, Islam S, Abdo H, Lönnerberg P, Lou D, Hjerling-Leffler J, Haeggström J,  
815 Kharchenko O, Kharchenko PV, Linnarsson S, Ernfors P. 2015. Unbiased classification of  
816 sensory neuron types by large-scale single-cell RNA sequencing. *Nat Neurosci* **18**:145–153.  
817 doi:10.1038/nn.3881
- 818 Wang W, Atianjoh F, Gauda EB, Yaster M, Li Y, Tao Y-X. 2011. Increased expression of sodium  
819 channel subunit Nav1.1 in the injured dorsal root ganglion after peripheral nerve injury. *Anat Rec*  
820 *Hoboken NJ 2007* **294**:1406–1411. doi:10.1002/ar.21437
- 821 Waxman SG, Kocsis JD, Black JA. 1994. Type III sodium channel mRNA is expressed in  
822 embryonic but not adult spinal sensory neurons, and is reexpressed following axotomy. *J*  
823 *Neurophysiol* **72**:466–470. doi:10.1152/jn.1994.72.1.466
- 824 Wilkinson KA, Kloefkorn HE, Hochman S. 2012. Characterization of muscle spindle afferents in  
825 the adult mouse using an in vitro muscle-nerve preparation. *PloS One* **7**:e39140.  
826 doi:10.1371/journal.pone.0039140

827 Woo S-H, Lukacs V, de Nooij JC, Zaytseva D, Criddle CR, Francisco A, Jessell TM, Wilkinson  
828 KA, Patapoutian A. 2015. Piezo2 is the principal mechanotransduction channel for proprioception.  
829 *Nat Neurosci* **18**:1756–1762. doi:10.1038/nn.4162

830 Wu H, Petitpré C, Fontanet P, Sharma A, Bellardita C, Quadros RM, Jannig PR, Wang Y, Heimel  
831 JA, Cheung KKY, Wanderoy S, Xuan Y, Meletis K, Ruas J, Gurusurthy CB, Kiehn O, Hadjab S,  
832 Lallemand F. 2021. Distinct subtypes of proprioceptive dorsal root ganglion neurons regulate  
833 adaptive proprioception in mice. *Nat Commun* **12**:1026. doi:10.1038/s41467-021-21173-9

834 Yu FH, Mantegazza M, Westenbroek RE, Robbins CA, Kalume F, Burton KA, Spain WJ, McKnight  
835 GS, Scheuer T, Catterall WA. 2006. Reduced sodium current in GABAergic interneurons in a  
836 mouse model of severe myoclonic epilepsy in infancy. *Nat Neurosci* **9**:1142–1149.  
837 doi:10.1038/nn1754

838 Zheng Y, Liu P, Bai L, Trimmer JS, Bean BP, Ginty DD. 2019. Deep Sequencing of  
839 Somatosensory Neurons Reveals Molecular Determinants of Intrinsic Physiological Properties.  
840 *Neuron* **103**:598-616.e7. doi:10.1016/j.neuron.2019.05.039

841
